# Supplementary material for: A broadly applicable quantitative relative reactivity model for nucleophilic aromatic substitution (S N Ar) using simple descriptors
Source: Royal Society of Chemistry journal article supplement (doi:10.1039/d2sc04041g), 2022-01-01
Supplement: d2sc04041g2.xlsx [file d2sc04041g2.xlsx]

## Sheet: SNAr All
Entry	Name	SMILES	Halide		Measured ΔG‡SNAr (kJ/mol)		Electron affinity (EA) (kJ/mol)	ESP1 (kJ/mol)	ESP2 (kJ/mol)		Norm. EA	Norm. ESP1	Norm. ESP2		Predicted ΔG‡SNAr (all data) (kJ/mol)	Absolute Error (all data)	Residuals (all data)	Predicted ΔG‡SNAr (60/40 split) (kJ/mol)	Absolute Error (60/40 split)	Residuals (60/40 split)		MLR Coefficients
1	2-bromo-5-nitropyridine	BrC1=CC=C([N+]([O-])=O)C=N1	Br		64.3555		127.819	98.6601	200.298		1	0.923024	0.90262		68.076	3.72043	-3.72043	68.7979	4.44241	-4.44241		EA	ESP1	ESP2	Intercept						SUMMARY OUTPUT
2	4-bromo-2-cyanopyridine	BrC1=CC=NC(C#N)=C1	Br		70.8426		54.4187	98.1366	141.966		0.651663	0.916953	0.756976		68.4678	2.3748	2.3748	69.0368	1.80582	1.80582		-0.0465164	-0.373305	0.0551648	99.8026	all data
3	2-bromo-5-cyanopyridine	BrC1=CC=C(C#N)C=N1	Br		72.2835		52.7813	90.676	166.995		0.643892	0.830445	0.819468		72.7098	0.426306	-0.426306	73.4759	1.19239	-1.19239		-0.0494738	-0.37766	0.0615482	100.054	60/40 split #1					Regression Statistics
4	2-bromo-3-cyanopyridine	BrC1=C(C#N)C=CC=N1	Br		73.0073		52.4889	88.8284	150.752		0.642505	0.80902	0.778913		72.5171	0.490234	0.490234	73.1884	0.181072	-0.181072		-9.80179	-32.1941	22.0942	87.651	all data (norm.)					Multiple R	0.959177
5	2-bromo-3-(trifluoromethyl)pyridine	BrC1=C(C(F)(F)F)C=CC=N1	Br		76.9183		6.48393	74.4146	110.57		0.424179	0.641886	0.678585		77.8211	0.902887	-0.902887	78.4348	1.51652	-1.51652		0.152938	0.502325	0.344737		% contribution					R Square	0.920021
6	2-bromo-5-(trifluoromethyl)pyridine	BrC1=CC=C(C(F)(F)F)C=N1	Br		76.9722		55.1137	74.3893	123.515		0.654961	0.641593	0.710907		76.2826	0.68963	0.68963	76.8352	0.137075	0.137075											Adjusted R Square	0.916593
7	4-bromo-2-chloro-pyridine	ClC1=CC(Br)=CC=N1	Br		76.9948		-16.4028	68.4263	48.2352		0.315565	0.572449	0.522949		77.6825	0.687712	-0.687712	77.992	0.997197	-0.997197		64.0901									Standard Error	2.41629
8	1-bromo-4-nitrobenzene	BrC1=CC=C([N+]([O-])=O)C=C1	Br		78.6143		101.577	72.6719	212.671		0.875461	0.621679	0.933511		79.6807	1.06638	-1.06638	80.6725	2.05812	-2.05812											Observations	74
9	2,5-dibromo-pyridine	BrC1=CC=C(Br)C=N1	Br		81.9831		-11.3565	57.0993	68.6556		0.339513	0.441108	0.573934		82.8027	0.81956	-0.81956	83.2769	1.2938	-1.2938
10	1-bromo-3,5-bis(trifluoromethyl)benzene	BrC1=CC(C(F)(F)F)=CC(C(F)(F)F)=C1	Br		85.9779		17.1592	81.7621	239.3		0.474841	0.727084	1		81.6831	4.29475	4.29475	83.0549	2.92294	2.92294											ANOVA
11	2-bromopyridine	BrC1=CC=CC=N1	Br		86.2187		-54.0327	35.5302	-11.3949		0.136985	0.191004	0.374064		88.4238	2.20506	-2.20506	88.6071	2.38844	-2.38844												df	SS	MS	F	Significance F
12	2-bromo-5-methypyridine	BrC1=CC=C(C)C=N1	Br		90.222		-56.9273	24.3671	-17.1958		0.123248	0.0615626	0.359581		92.4056	2.18363	-2.18363	92.6092	2.38716	-2.38716											Regression	3	4701.29	1567.1	268.409	2.60438e-38
13	2-bromo-3-methoxypyridine	BrC1=C(OC)C=CC=N1	Br		92.4118		-50.0748	34.3974	-2.05861		0.155768	0.177869	0.397375		89.1776	3.23427	3.23427	89.4138	2.99806	2.99806											Residual	70	408.691	5.83845
14	2-bromo-5-methoxypyridine	BrC1=CC=C(OC)C=N1	Br		94.913		-53.8996	19.0579	-8.78962		0.137617	0	0.380569		94.7105	0.202523	0.202523	94.9818	0.0688348	-0.0688348											Total	73	5109.98
15	2,4-dichloropyrimidine	ClC1=NC(Cl)=CC=N1	Cl		61.3806		12.6301	101.171	17.2963		0.453347	0.952138	0.445701		62.4016	1.02096	-1.02096	62.2851	0.904491	-0.904491
16	4,6-dichloropyrimidine	ClC1=CC(Cl)=NC=N1	Cl		62.034		4.61787	99.1485	24.3398		0.415323	0.928687	0.463287		63.9178	1.88379	-1.88379	63.8788	1.84478	-1.84478												Coefficients	Standard Error	t Stat	P-value	Lower 95%	Upper 95%	Lower 95.0%	Upper 95.0%
17	2-chloro-5-nitropyridine	ClC1=CC=C([N+]([O-])=O)C=N1	Cl		64.0292		123.214	105.299	196.458		0.978145	1	0.89303		65.6001	1.5709	-1.5709	66.2823	2.25308	-2.25308											Intercept	99.8026	1.2031	82.9544	1.21841e-71	97.403	102.202	97.403	102.202
18	2-chloro-3-nitropyridine	ClC1=C([N+]([O-])=O)C=CC=N1	Cl		67.7304		113.855	101.824	176.895		0.933728	0.959711	0.844185		66.2534	1.47701	1.47701	66.8535	0.876909	0.876909											X Variable 1	-0.0465164	0.00815369	-5.70495	2.57697e-07	-0.0627784	-0.0302544	-0.0627784	-0.0302544
19	4,6-dichloro-2-methylpyrimidine	ClC1=NC(C)=NC(Cl)=C1	Cl		67.8169		-2.25973	86.0815	-0.8368		0.382684	0.777169	0.400426		67.7268	0.0901057	0.0901057	67.6044	0.21258	0.21258											X Variable 2	-0.373305	0.0202007	-18.4798	1.23726e-28	-0.413594	-0.333016	-0.413594	-0.333016
20	4-chloro-2-(trifluoromethyl)quinoline	ClC1=CC(C(F)(F)F)=NC2=CC=CC=C21	Cl		69.2354		69.4706	75.2683	69.5043		0.723095	0.651785	0.576053		72.3072	3.07177	-3.07177	72.4687	3.23326	-3.23326											X Variable 3	0.0551648	0.00531198	10.385	8.11662e-16	0.0445704	0.0657592	0.0445704	0.0657592
21	4-chloro-6-(trifluoromethyl)quinoline	ClC1=CC=NC2=CC=C(C(F)(F)F)C=C21	Cl		69.9828		74.295	74.1677	59.3797		0.74599	0.639023	0.550774		71.9351	1.9523	-1.9523	72.0225	2.03969	-2.03969
22	2-chloro-5-cyano-pyridine	ClC1=CC=C(C#N)C=N1	Cl		70.6115		46.3138	96.677	163.098		0.613199	0.900028	0.809738		70.5555	0.0560791	0.0560791	71.2897	0.678118	-0.678118
23	2-chloro-4,6-dimethyl-3-cyano-pyridine	ClC1=C(C#N)C(C)=CC(C)=N1	Cl		71.4942		24.6042	74.3952	96.1142		0.510172	0.641661	0.642493		76.1881	4.69382	-4.69382	76.6559	5.16167	-5.16167
24	4-chloro-2-(methylthio)pyrimidine	CSC1=NC=CC(Cl)=N1	Cl		71.6882		-16.7801	67.6649	-38.0744		0.313775	0.56362	0.307451		73.2231	1.53488	-1.53488	72.9861	1.29784	-1.29784												SUMMARY OUTPUT - NORMALIZED DESCRIPTORS
25	3,4,5-trichloro-pyridine	ClC1=CN=CC(Cl)=C1Cl	Cl		72.1837		-2.89461	90.1805	108.8		0.379671	0.824699	0.674167		72.2743	0.0905817	-0.0905817	72.8357	0.651992	-0.651992
26	2-chloro-3-cyano-pyridine	ClC1=C(C#N)C=CC=N1	Cl		72.4308		49.0154	95.859	150.244		0.626021	0.890543	0.777643		70.026	2.40475	2.40475	70.6737	1.75703	1.75703												Regression Statistics
27	2-chloro-4-cyano-pyridine	ClC1=CC(C#N)=CC=N1	Cl		73.1654		69.8566	91.9308	149.603		0.724927	0.844994	0.776044		70.4877	2.67768	2.67768	71.0868	2.07858	2.07858												Multiple R	0.959177
28	4-chloro-2-methylpyrimidine	ClC1=CC=NC(C)=N1	Cl		73.2717		-31.8407	68.0204	-60.3884		0.242302	0.567742	0.251738		72.56	0.711735	0.711735	72.2235	1.04822	1.04822												R Square	0.920021
29	2-chloro-6-cyano-pyridine	ClC1=CC=CC(C#N)=N1	Cl		73.9494		54.5152	91.9131	147.579		0.652121	0.844789	0.77099		71.0962	2.85314	2.85314	71.7279	2.22151	2.22151												Adjusted R Square	0.916593
30	4-chloro-2-(trifluoromethyl)pyridine	ClC1=CC=NC(C(F)(F)F)=C1	Cl		74.37		3.08758	88.136	96.1254		0.408061	0.800991	0.642521		72.0601	2.30998	2.30998	72.5318	1.83827	1.83827												Standard Error	2.41629
31	2-chloro-5-(trifluoromethyl)pyridine	ClC1=CC=C(C(F)(F)F)C=N1	Cl		74.6968		0.578922	80.5433	117.45		0.396155	0.712951	0.695764		76.1875	1.49072	-1.49072	76.8358	2.13904	-2.13904												Observations	74
32	2-chloro-4-(trifluoromethyl)pyridine	ClC1=CC(C(F)(F)F)=CC=N1	Cl		75.7475		14.9555	76.3185	102.229		0.464382	0.663963	0.65776		76.2562	0.508744	-0.508744	76.7833	1.03579	-1.03579
33	2-chloro-6-bromo-pyridine	BrC1=CC=CC(Cl)=N1	Cl		76.6031		-21.2271	64.0013	54.8608		0.29267	0.521139	0.539491		79.9243	3.3212	-3.3212	80.3097	3.70652	-3.70652												ANOVA
34	4-chloro-3-bromo-pyridine	BrC1=CN=CC=C1Cl	Cl		76.6235		-25.0866	70.9904	42.0862		0.274354	0.602181	0.507596		76.7901	0.166573	-0.166573	77.0748	0.451322	-0.451322													df	SS	MS	F	Significance F
35	3,4-dichloro-pyridine	ClC1=CN=CC=C1Cl	Cl		76.7622		-28.9461	71.4814	46.3825		0.256039	0.607874	0.518323		77.0233	0.261154	-0.261154	77.3448	0.582605	-0.582605												Regression	3	4701.29	1567.1	268.409	2.60438e-38
36	4-(6-chloropyrimidin-4-yl)morpholine	ClC1=NC=NC(N2CCOCC2)=C1	Cl		76.897		-46.3138	39.2217	-98.4452		0.173617	0.233808	0.156718		81.8845	4.98754	-4.98754	81.4733	4.57635	-4.57635												Residual	70	408.691	5.83845
37	2-chloro-6-methyl-4 (trifluoromethyl)pyridine	ClC1=CC(C(F)(F)F)=CC(C)=N1	Cl		77.1792		-4.72786	66.4097	76.6996		0.370971	0.549066	0.594019		79.4625	2.28325	-2.28325	79.9279	2.74869	-2.74869												Total	73	5109.98
38	2,6-dichloropyridine	ClC1=CC=CC(Cl)=N1	Cl		77.2025		-27.9812	62.5826	49.8303		0.260618	0.504689	0.526931		80.4906	3.28811	-3.28811	80.8699	3.66746	-3.66746
39	2,4-dichloro-pyridine	ClC1=CC(Cl)=CC=N1	Cl		77.3558		-23.1569	71.9774	46.5251		0.283512	0.613625	0.518679		76.5768	0.77906	0.77906	76.8798	0.475981	0.475981													Coefficients	Standard Error	t Stat	P-value	Lower 95%	Upper 95%	Lower 95.0%	Upper 95.0%
40	2-chloro-3-(trifluoromethyl)pyridine	ClC1=C(C(F)(F)F)C=CC=N1	Cl		77.6887		-5.01732	77.1838	105.185		0.369597	0.673996	0.665142		77.0254	0.663344	0.663344	77.6266	0.0621313	0.0621313												Intercept	87.651	0.76259	114.938	1.7558e-81	86.13	89.1719	86.13	89.1719
41	2-chloro-6-(trifluoromethyl)pyridine	ClC1=CC=CC(C(F)(F)F)=N1	Cl		78.9094		4.72786	77.8247	100.647		0.415845	0.681428	0.65381		76.0824	2.82695	2.82695	76.6231	2.28632	2.28632												X Variable 1	-9.80179	1.71812	-5.70495	2.57697e-07	-13.2285	-6.37511	-13.2285	-6.37511
42	4-chloro-pyridine-2-carboxamide	ClC1=CC=NC(C(N)=O)=C1	Cl		79.7811		-5.69273	70.8151	25.1874		0.366392	0.600148	0.465403		75.0212	4.7599	4.7599	75.1414	4.63962	4.63962												X Variable 2	-32.1941	1.74212	-18.4798	1.23726e-28	-35.6687	-28.7195	-35.6687	-28.7195
43	4-chloro-quinoline	ClC1=CC=NC2=CC=CC=C21	Cl		79.8819		27.3058	44.2789	-33.895		0.522993	0.292449	0.317886		80.133	0.25117	-0.25117	79.8941	0.0122773	-0.0122773												X Variable 3	22.0942	2.12752	10.385	8.11662e-16	17.851	26.3374	17.851	26.3374
44	4-chloro-N-Methylpyridine-2-carboxamide	ClC1=CC=NC(C(NC)=O)=C1	Cl		80.5058		8.10491	68.4744	1.88556		0.431872	0.573006	0.407223		73.9677	6.53808	6.53808	73.9086	6.59716	6.59716
45	2-chloro-3-bromo-pyridine	ClC1=C(Br)C=CC=N1	Cl		81.0918		-23.1569	59.8112	45.9246		0.283512	0.472553	0.51718		81.0853	0.00648277	0.00648277	81.4375	0.345745	-0.345745
46	2,3-dichloro-pyridine	ClC1=C(Cl)C=CC=N1	Cl		81.1258		-27.9812	60.0677	49.4302		0.260618	0.475527	0.525933		81.4074	0.281609	-0.281609	81.7951	0.669366	-0.669366
47	2-chloro-5-bromo-pyridine	ClC1=CC=C(Br)C=N1	Cl		82.2146		-17.3677	61.375	63.4058		0.310986	0.490686	0.560827		81.1966	1.01798	1.01798	81.6365	0.578092	0.578092
48	4-chloro-6-(pyrrolidin-1-yl)pyrimidine	ClC1=CC(N2CCCC2)=NC=N1	Cl		82.3884		-56.9273	22.6528	-161.213		0.123248	0.0416849	0		85.1009	2.71252	-2.71252	84.3926	2.0042	-2.0042
49	4-chloro-7-methoxyquinoline	ClC1=CC=NC2=CC(OC)=CC=C21	Cl		82.6293		13.7976	32.9469	-64.5605		0.458888	0.161049	0.241321		83.3	0.670774	-0.670774	82.9547	0.325429	-0.325429
50	2,5-dichloro-pyridine	ClC1=CC=C(Cl)C=N1	Cl		83.0415		-22.192	60.398	65.0997		0.288091	0.479357	0.565056		81.8792	1.16231	1.16231	82.3484	0.69309	0.69309
51	2-chloro-5-(1,3-dioxolan-2-yl)pyridine	ClC1=CC=C(C2OCCO2)C=N1	Cl		84.7752		-45.3489	29.8655	-32.6442		0.178196	0.125319	0.321009		88.9623	4.18704	-4.18704	89.009	4.23377	-4.23377
52	2-(benzyloxy)-4-chloropyridine	ClC1=CC(OCC2=CC=CC=C2)=NC=C1	Cl		86.2294		-28.22	42.617	-47.4188		0.259484	0.273178	0.28412		82.5902	3.63912	3.63912	82.4365	3.79289	3.79289
53	4-chloro-6,7-dimethoxyquinoline	ClC1=CC=NC2=CC(OC)=C(OC)C=C21	Cl		87.58		3.66651	21.6297	-97.3361		0.410808	0.0298214	0.159487		86.188	1.39199	1.39199	85.7127	1.86731	1.86731
54	4-chloro-2-methyl-pyridine	CC1=CC(Cl)=CC=N1	Cl		87.7737		-58.8571	39.3211	-45.5314		0.11409	0.234961	0.288833		85.3499	2.42381	2.42381	85.3131	2.46057	2.46057
55	2-chloro-6-methoxypyridine	ClC1=CC=CC(OC)=N1	Cl		88.5591		-73.0418	29.0914	-30.5432		0.0467734	0.116343	0.326255		90.6553	2.09624	-2.09624	90.8007	2.24166	-2.24166
56	2-chloro-pyridine	ClC1=CC=CC=N1	Cl		88.8		-60.7868	38.8165	-18.3374		0.104932	0.22911	0.35673		87.1282	1.67184	1.67184	87.2729	1.5271	1.5271
57	2-chloro-6-isopropoxypyridine	ClC1=CC=CC(OC(C)C)=N1	Cl		89.1561		-68.5058	25.2033	-38.7837		0.0683001	0.0712589	0.30568		91.4412	2.28508	-2.28508	91.5375	2.38141	-2.38141
58	4-(benzyloxy)-2-chloropyridine	ClC1=CC(OCC2=CC=CC=C2)=CC=N1	Cl		90.5979		-40.815	30.2467	-45.7932		0.199712	0.129739	0.288179		87.8837	2.71426	2.71426	87.8314	2.76653	2.76653
59	2-chloro-6-methyl-pyridine	ClC1=CC=CC(C)=N1	Cl		90.608		-62.7165	29.5297	-41.1327		0.0957741	0.121425	0.299815		89.4272	1.18074	1.18074	89.4726	1.13537	1.13537
60	2-chloro-3-methyl-pyridine	ClC1=C(C)C=CC=N1	Cl		90.828		-68.5058	34.386	-28.5343		0.0683001	0.177736	0.331271		88.5786	2.24936	2.24936	88.7004	2.1276	2.1276
61	2-chloro-4-methyl-pyridine	ClC1=CC(C)=CC=N1	Cl		91.256		-67.5409	28.9759	-42.5973		0.0728791	0.115003	0.296159		89.7776	1.47839	1.47839	89.8303	1.42568	1.42568
62	2-chloro-6-(tert-butoxy)-pyridine	ClC1=CC=CC(OC(C)(C)C)=N1	Cl		91.6918		-75.2599	23.2774	-26.1043		0.0362472	0.0489268	0.337338		93.1738	1.48201	-1.48201	93.3794	1.68763	-1.68763
63	2-chloro-5-methyl-pyridine	ClC1=CC=C(C)C=N1	Cl		94.2552		-63.3572	27.5976	-24.9353		0.0927336	0.0990213	0.340257		91.0718	3.18337	3.18337	91.2309	3.0243	3.0243
64	2-chloro-3-methoxypyridine	ClC1=C(OC)C=CC=N1	Cl		94.3527		-71.357	25.5504	-28.5542		0.0547692	0.0752833	0.331221		92.0085	2.34416	2.34416	92.1771	2.17561	2.17561
65	2-chloro-5-methoxypyridine	ClC1=CC=C(OC)C=N1	Cl		95.6149		-58.2781	24.2168	-15.5421		0.116837	0.0598195	0.36371		92.6158	2.99909	2.99909	92.8346	2.78035	2.78035
66	2-chloro-4-fluoropyridine	ClC1=CC(F)=CC=N1	F		72.5954		-56.8762	84.4231	44.0827		0.123491	0.757939	0.512581		73.3645	0.769077	-0.769077	73.6975	1.10209	-1.10209
67	2-chloro-6-fluoropyridine	ClC1=CC=CC(F)=N1	F		74.9861		-39.7112	80.2464	44.1187		0.204951	0.709508	0.512671		74.1272	0.858919	0.858919	74.4278	0.558254	0.558254
68	2-chloro-3-fluoro-5-methyl-pyridine	ClC1=C(F)C=C(C)C=N1	F		79.3836		-38.2417	70.4227	142.547		0.211925	0.595598	0.758425		83.1558	3.77221	-3.77221	84.1232	4.73962	-4.73962
69	2-chloro-3-fluoropyridine	ClC1=C(F)C=CC=N1	F		79.3991		-40.2428	79.8346	166.128		0.202428	0.704733	0.817304		81.0363	1.63721	-1.63721	82.1192	2.72008	-2.72008
70	1-bromo-3,5-difluorobenzene	BrC1=CC(F)=CC(F)=C1	F		80.8536		-60.9624	63.9978	119.662		0.104099	0.521098	0.701286		85.3487	4.4951	-4.4951	86.2652	5.41159	-5.41159
71	2-bromo-5-fluoropyridine	BrC1=CC=C(F)C=N1	F		81.2061		-25.5739	81.2011	177.914		0.272042	0.720579	0.84673		80.4939	0.712132	0.712132	81.6027	0.396639	-0.396639
72	2-chloro-5-fluoropyridine	ClC1=CC=C(F)C=N2	F		82.1608		-32.0096	78.9946	175.284		0.2415	0.694993	0.840163		81.4719	0.688889	0.688889	82.5925	0.431734	-0.431734
73	1-bromo-4-fluorobenzene	BrC1=CC=C(F)C=C1	F		90.3579		-64.1899	43.9798	70.0038		0.0887819	0.288981	0.5773		90.2323	0.125625	0.125625	90.9285	0.570605	-0.570605
74	1-chloro-4-fluorobenzene	ClC1=CC=C(F)C=C1	F		91.2312		-82.8978	42.1158	68.8623		0	0.267366	0.57445		91.7354	0.504193	-0.504193	92.4878	1.25658	-1.25658
						Max	127.819	105.299	239.3						All data fit			60/40 split
						Min	-82.8978	19.0579	-161.213						MAE All	1.8725		MAE All	1.93108
															MAE Br	1.66415		MAE Br	1.74213
															MAE Cl	1.99419		MAE Cl	1.98673
															MAE F	1.50704		MAE F	1.90969
															R2 All	0.920021		R2 All	0.91774
															R2 Br	0.93964		R2 Br	0.945095
															R2 Cl	0.918651		R2 Cl	0.919478
															R2 F	0.902184		R2 F	0.895821

## Sheet: SNAr All_with steric
Entry	Name	SMILES	Halide		Measured ΔG‡SNAr (kJ/mol)		Electron affinity (EA) (kJ/mol)	steric A value (kJ/mol)	ESP1 (kJ/mol)	ESP2 (kJ/mol)		Norm. EA	Norm. steric	Norm. ESP1	Norm. ESP2		Predicted ΔG‡SNAr (all data) (kJ/mol)	Absolute Error (all data)	Residuals (all data)		MLR Coefficients
1	2-bromo-5-nitropyridine	BrC1=CC=C([N+]([O-])=O)C=N1	Br		64.3555		127.819	0	98.6601	200.298		1	0	0.923024	0.90262		67.9955	3.63998	-3.63998		EA	Steric	ESP1	ESP2	Intercept					SUMMARY OUTPUT
2	4-bromo-2-cyanopyridine	BrC1=CC=NC(C#N)=C1	Br		70.8426		54.4187	0	98.1366	141.966		0.651663	0	0.916953	0.756976		68.3739	2.46872	2.46872		-0.0460502	0.115612	-0.373655	0.0548122	99.7677	all data
3	2-bromo-5-cyanopyridine	BrC1=CC=C(C#N)C=N1	Br		72.2835		52.7813	0	90.676	166.995		0.643892	0	0.830445	0.819468		72.6089	0.325412	-0.325412		-9.70357	1.2093	-32.2243	21.953	87.6276	all data (norm.)				Regression Statistics
4	2-bromo-3-cyanopyridine	BrC1=C(C#N)C=CC=N1	Br		73.0073		52.4889	0.87864	88.8284	150.752		0.642505	0.084	0.80902	0.778913		72.524	0.48331	0.48331		0.149079	0.0185788	0.495072	0.337271		% contribution				Multiple R	0.959536
5	2-bromo-3-(trifluoromethyl)pyridine	BrC1=C(C(F)(F)F)C=CC=N1	Br		76.9183		6.48393	8.7864	74.4146	110.57		0.424179	0.84	0.641886	0.678585		78.7401	1.82181	-1.82181											R Square	0.920709
6	2-bromo-5-(trifluoromethyl)pyridine	BrC1=CC=C(C(F)(F)F)C=N1	Br		76.9722		55.1137	0	74.3893	123.515		0.654961	0	0.641593	0.710907		76.2038	0.768407	0.768407		65.0902									Adjusted R Square	0.916112
7	4-bromo-2-chloro-pyridine	ClC1=CC(Br)=CC=N1	Br		76.9948		-16.4028	0	68.4263	48.2352		0.315565	0	0.572449	0.522949		77.5991	0.604227	-0.604227											Standard Error	2.42325
8	1-bromo-4-nitrobenzene	BrC1=CC=C([N+]([O-])=O)C=C1	Br		78.6143		101.577	0	72.6719	212.671		0.875461	0	0.621679	0.933511		79.5928	0.978424	-0.978424											Observations	74
9	2,5-dibromo-pyridine	BrC1=CC=C(Br)C=N1	Br		81.9831		-11.3565	0	57.0993	68.6556		0.339513	0	0.441108	0.573934		82.7183	0.735192	-0.735192
10	1-bromo-3,5-bis(trifluoromethyl)benzene	BrC1=CC(C(F)(F)F)=CC(C(F)(F)F)=C1	Br		85.9779		17.1592	0	81.7621	239.3		0.474841	0	0.727084	1		81.5432	4.43462	4.43462											ANOVA
11	2-bromopyridine	BrC1=CC=CC=N1	Br		86.2187		-54.0327	0	35.5302	-11.3949		0.136985	0	0.191004	0.374064		88.3553	2.13657	-2.13657												df	SS	MS	F	Significance F
12	2-bromo-5-methypyridine	BrC1=CC=C(C)C=N1	Br		90.222		-56.9273	0	24.3671	-17.1958		0.123248	0	0.0615626	0.359581		92.3417	2.11975	-2.11975											Regression	4	4704.8	1176.2	200.302	3.45684e-37
13	2-bromo-3-methoxypyridine	BrC1=C(OC)C=CC=N1	Br		92.4118		-50.0748	2.5104	34.3974	-2.05861		0.155768	0.24	0.177869	0.397375		89.3982	3.01357	3.01357											Residual	69	405.177	5.87212
14	2-bromo-5-methoxypyridine	BrC1=CC=C(OC)C=N1	Br		94.913		-53.8996	0	19.0579	-8.78962		0.137617	0	0	0.380569		94.6469	0.266102	0.266102											Total	73	5109.98
15	2,4-dichloropyrimidine	ClC1=NC(Cl)=CC=N1	Cl		61.3806		12.6301	0	101.171	17.2963		0.453347	0	0.952138	0.445701		62.3311	0.95046	-0.95046
16	4,6-dichloropyrimidine	ClC1=CC(Cl)=NC=N1	Cl		62.034		4.61787	0	99.1485	24.3398		0.415323	0	0.928687	0.463287		63.8418	1.80777	-1.80777												Coefficients	Standard Error	t Stat	P-value	Lower 95%	Upper 95%	Lower 95.0%	Upper 95.0%
17	2-chloro-5-nitropyridine	ClC1=CC=C([N+]([O-])=O)C=N1	Cl		64.0292		123.214	0	105.299	196.458		0.978145	0	1	0.89303		65.5165	1.48734	-1.48734											Intercept	99.7677	1.20741	82.6297	9.77952e-71	97.359	102.176	97.359	102.176
18	2-chloro-3-nitropyridine	ClC1=C([N+]([O-])=O)C=CC=N1	Cl		67.7304		113.855	4.6024	101.824	176.895		0.933728	0.44	0.959711	0.844185		66.7056	1.02474	1.02474											X Variable 1	-0.0460502	0.00819933	-5.61634	3.79558e-07	-0.0624075	-0.029693	-0.0624075	-0.029693
19	4,6-dichloro-2-methylpyrimidine	ClC1=NC(C)=NC(Cl)=C1	Cl		67.8169		-2.25973	0	86.0815	-0.8368		0.382684	0	0.777169	0.400426		67.6611	0.155874	0.155874											X Variable 2	0.115612	0.149431	0.773678	0.441764	-0.182495	0.413719	-0.182495	0.413719
20	4-chloro-2-(trifluoromethyl)quinoline	ClC1=CC(C(F)(F)F)=NC2=CC=CC=C21	Cl		69.2354		69.4706	0	75.2683	69.5043		0.723095	0	0.651785	0.576053		72.2538	3.01842	-3.01842											X Variable 3	-0.373655	0.0202639	-18.4394	2.26575e-28	-0.414081	-0.33323	-0.414081	-0.33323
21	4-chloro-6-(trifluoromethyl)quinoline	ClC1=CC=NC2=CC=C(C(F)(F)F)C=C21	Cl		69.9828		74.295	0	74.1677	59.3797		0.74599	0	0.639023	0.550774		71.8879	1.90516	-1.90516											X Variable 4	0.0548122	0.00534674	10.2515	1.65917e-15	0.0441457	0.0654786	0.0441457	0.0654786
22	2-chloro-5-cyano-pyridine	ClC1=CC=C(C#N)C=N1	Cl		70.6115		46.3138	0	96.677	163.098		0.613199	0	0.900028	0.809738		70.4508	0.160715	0.160715
23	2-chloro-4,6-dimethyl-3-cyano-pyridine	ClC1=C(C#N)C(C)=CC(C)=N1	Cl		71.4942		24.6042	0.87864	74.3952	96.1142		0.510172	0.084	0.641661	0.642493		76.2063	4.71206	-4.71206
24	4-chloro-2-(methylthio)pyrimidine	CSC1=NC=CC(Cl)=N1	Cl		71.6882		-16.7801	0	67.6649	-38.0744		0.313775	0	0.56362	0.307451		73.1701	1.48191	-1.48191
25	3,4,5-trichloro-pyridine	ClC1=CN=CC(Cl)=C1Cl	Cl		72.1837		-2.89461	3.59824	90.1805	108.8		0.379671	0.344	0.824699	0.674167		72.5841	0.400424	-0.400424												SUMMARY OUTPUT - NORMALIZED DESCRIPTORS
26	2-chloro-3-cyano-pyridine	ClC1=C(C#N)C=CC=N1	Cl		72.4308		49.0154	0.87864	95.859	150.244		0.626021	0.084	0.890543	0.777643		70.0291	2.40172	2.40172
27	2-chloro-4-cyano-pyridine	ClC1=CC(C#N)=CC=N1	Cl		73.1654		69.8566	0	91.9308	149.603		0.724927	0	0.844994	0.776044		70.4004	2.76492	2.76492												Regression Statistics
28	4-chloro-2-methylpyrimidine	ClC1=CC=NC(C)=N1	Cl		73.2717		-31.8407	0	68.0204	-60.3884		0.242302	0	0.567742	0.251738		72.5078	0.763975	0.763975												Multiple R	0.959536
29	2-chloro-6-cyano-pyridine	ClC1=CC=CC(C#N)=N1	Cl		73.9494		54.5152	0	91.9131	147.579		0.652121	0	0.844789	0.77099		71.0026	2.94681	2.94681												R Square	0.920709
30	4-chloro-2-(trifluoromethyl)pyridine	ClC1=CC=NC(C(F)(F)F)=C1	Cl		74.37		3.08758	0	88.136	96.1254		0.408061	0	0.800991	0.642521		71.9619	2.40816	2.40816												Adjusted R Square	0.916112
31	2-chloro-5-(trifluoromethyl)pyridine	ClC1=CC=C(C(F)(F)F)C=N1	Cl		74.6968		0.578922	0	80.5433	117.45		0.396155	0	0.712951	0.695764		76.0833	1.38651	-1.38651												Standard Error	2.42325
32	2-chloro-4-(trifluoromethyl)pyridine	ClC1=CC(C(F)(F)F)=CC=N1	Cl		75.7475		14.9555	0	76.3185	102.229		0.464382	0	0.663963	0.65776		76.1656	0.418078	-0.418078												Observations	74
33	2-chloro-6-bromo-pyridine	BrC1=CC=CC(Cl)=N1	Cl		76.6031		-21.2271	0	64.0013	54.8608		0.29267	0	0.521139	0.539491		79.8378	3.23468	-3.23468
34	4-chloro-3-bromo-pyridine	BrC1=CN=CC=C1Cl	Cl		76.6235		-25.0866	1.58992	70.9904	42.0862		0.274354	0.152	0.602181	0.507596		76.8876	0.264124	-0.264124												ANOVA
35	3,4-dichloro-pyridine	ClC1=CN=CC=C1Cl	Cl		76.7622		-28.9461	1.79912	71.4814	46.3825		0.256039	0.172	0.607874	0.518323		77.1416	0.379406	-0.379406													df	SS	MS	F	Significance F
36	4-(6-chloropyrimidin-4-yl)morpholine	ClC1=NC=NC(N2CCOCC2)=C1	Cl		76.897		-46.3138	0	39.2217	-98.4452		0.173617	0	0.233808	0.156718		81.8491	4.95205	-4.95205												Regression	4	4704.8	1176.2	200.302	3.45684e-37
37	2-chloro-6-methyl-4 (trifluoromethyl)pyridine	ClC1=CC(C(F)(F)F)=CC(C)=N1	Cl		77.1792		-4.72786	0	66.4097	76.6996		0.370971	0	0.549066	0.594019		79.3751	2.19587	-2.19587												Residual	69	405.177	5.87212
38	2,6-dichloropyridine	ClC1=CC=CC(Cl)=N1	Cl		77.2025		-27.9812	0	62.5826	49.8303		0.260618	0	0.504689	0.526931		80.4032	3.20071	-3.20071												Total	73	5109.98
39	2,4-dichloro-pyridine	ClC1=CC(Cl)=CC=N1	Cl		77.3558		-23.1569	0	71.9774	46.5251		0.283512	0	0.613625	0.518679		76.4895	0.866333	0.866333
40	2-chloro-3-(trifluoromethyl)pyridine	ClC1=C(C(F)(F)F)C=CC=N1	Cl		77.6887		-5.01732	10.46	77.1838	105.185		0.369597	1	0.673996	0.665142		78.1333	0.444631	-0.444631													Coefficients	Standard Error	t Stat	P-value	Lower 95%	Upper 95%	Lower 95.0%	Upper 95.0%
41	2-chloro-6-(trifluoromethyl)pyridine	ClC1=CC=CC(C(F)(F)F)=N1	Cl		78.9094		4.72786	0	77.8247	100.647		0.415845	0	0.681428	0.65381		75.987	2.92236	2.92236												Intercept	87.6276	0.765382	114.489	1.94554e-80	86.1007	89.1545	86.1007	89.1545
42	4-chloro-pyridine-2-carboxamide	ClC1=CC=NC(C(N)=O)=C1	Cl		79.7811		-5.69273	0	70.8151	25.1874		0.366392	0	0.600148	0.465403		74.95	4.8311	4.8311												X Variable 1	-9.70357	1.72774	-5.61634	3.79558e-07	-13.1503	-6.25682	-13.1503	-6.25682
43	4-chloro-quinoline	ClC1=CC=NC2=CC=CC=C21	Cl		79.8819		27.3058	0	44.2789	-33.895		0.522993	0	0.292449	0.317886		80.1073	0.225469	-0.225469												X Variable 2	1.2093	1.56305	0.773678	0.441764	-1.9089	4.3275	-1.9089	4.3275
44	4-chloro-N-Methylpyridine-2-carboxamide	ClC1=CC=NC(C(NC)=O)=C1	Cl		80.5058		8.10491	0	68.4744	1.88556		0.431872	0	0.573006	0.407223		73.912	6.59382	6.59382												X Variable 3	-32.2243	1.74757	-18.4394	2.26575e-28	-35.7106	-28.738	-35.7106	-28.738
45	2-chloro-3-bromo-pyridine	ClC1=C(Br)C=CC=N1	Cl		81.0918		-23.1569	1.58992	59.8112	45.9246		0.283512	0.152	0.472553	0.51718		81.1863	0.0945273	-0.0945273												X Variable 4	21.953	2.14144	10.2515	1.65917e-15	17.681	26.2251	17.681	26.2251
46	2,3-dichloro-pyridine	ClC1=C(Cl)C=CC=N1	Cl		81.1258		-27.9812	1.79912	60.0677	49.4302		0.260618	0.172	0.475527	0.525933		81.529	0.40323	-0.40323
47	2-chloro-5-bromo-pyridine	ClC1=CC=C(Br)C=N1	Cl		82.2146		-17.3677	0	61.375	63.4058		0.310986	0	0.490686	0.560827		81.1098	1.10479	1.10479
48	4-chloro-6-(pyrrolidin-1-yl)pyrimidine	ClC1=CC(N2CCCC2)=NC=N1	Cl		82.3884		-56.9273	0	22.6528	-161.213		0.123248	0	0.0416849	0		85.0884	2.70002	-2.70002
49	4-chloro-7-methoxyquinoline	ClC1=CC=NC2=CC(OC)=CC=C21	Cl		82.6293		13.7976	0	32.9469	-64.5605		0.458888	0	0.161049	0.241321		83.2828	0.653555	-0.653555
50	2,5-dichloro-pyridine	ClC1=CC=C(Cl)C=N1	Cl		83.0415		-22.192	0	60.398	65.0997		0.288091	0	0.479357	0.565056		81.7898	1.25163	1.25163
51	2-chloro-5-(1,3-dioxolan-2-yl)pyridine	ClC1=CC=C(C2OCCO2)C=N1	Cl		84.7752		-45.3489	0	29.8655	-32.6442		0.178196	0	0.125319	0.321009		88.9073	4.13208	-4.13208
52	2-(benzyloxy)-4-chloropyridine	ClC1=CC(OCC2=CC=CC=C2)=NC=C1	Cl		86.2294		-28.22	0	42.617	-47.4188		0.259484	0	0.273178	0.28412		82.544	3.68535	3.68535
53	4-chloro-6,7-dimethoxyquinoline	ClC1=CC=NC2=CC(OC)=C(OC)C=C21	Cl		87.58		3.66651	0	21.6297	-97.3361		0.410808	0	0.0298214	0.159487		86.1816	1.39842	1.39842
54	4-chloro-2-methyl-pyridine	CC1=CC(Cl)=CC=N1	Cl		87.7737		-58.8571	0	39.3211	-45.5314		0.11409	0	0.234961	0.288833		85.2898	2.48384	2.48384
55	2-chloro-6-methoxypyridine	ClC1=CC=CC(OC)=N1	Cl		88.5591		-73.0418	0	29.0914	-30.5432		0.0467734	0	0.116343	0.326255		90.587	2.0279	-2.0279
56	2-chloro-pyridine	ClC1=CC=CC=N1	Cl		88.8		-60.7868	0	38.8165	-18.3374		0.104932	0	0.22911	0.35673		87.0578	1.74218	1.74218
57	2-chloro-6-isopropoxypyridine	ClC1=CC=CC(OC(C)C)=N1	Cl		89.1561		-68.5058	0	25.2033	-38.7837		0.0683001	0	0.0712589	0.30568		91.3792	2.22312	-2.22312
58	4-(benzyloxy)-2-chloropyridine	ClC1=CC(OCC2=CC=CC=C2)=CC=N1	Cl		90.5979		-40.815	0	30.2467	-45.7932		0.199712	0	0.129739	0.288179		87.8353	2.76261	2.76261
59	2-chloro-6-methyl-pyridine	ClC1=CC=CC(C)=N1	Cl		90.608		-62.7165	0	29.5297	-41.1327		0.0957741	0	0.121425	0.299815		89.3673	1.24069	1.24069
60	2-chloro-3-methyl-pyridine	ClC1=C(C)C=CC=N1	Cl		90.828		-68.5058	7.1128	34.386	-28.5343		0.0683001	0.68	0.177736	0.331271		89.3322	1.49583	1.49583
61	2-chloro-4-methyl-pyridine	ClC1=CC(C)=CC=N1	Cl		91.256		-67.5409	0	28.9759	-42.5973		0.0728791	0	0.115003	0.296159		89.7161	1.53987	1.53987
62	2-chloro-6-(tert-butoxy)-pyridine	ClC1=CC=CC(OC(C)(C)C)=N1	Cl		91.6918		-75.2599	0	23.2774	-26.1043		0.0362472	0	0.0489268	0.337338		93.1049	1.4131	-1.4131
63	2-chloro-5-methyl-pyridine	ClC1=CC=C(C)C=N1	Cl		94.2552		-63.3572	0	27.5976	-24.9353		0.0927336	0	0.0990213	0.340257		91.0065	3.24865	3.24865
64	2-chloro-3-methoxypyridine	ClC1=C(OC)C=CC=N1	Cl		94.3527		-71.357	3.138	25.5504	-28.5542		0.0547692	0.3	0.0752833	0.331221		92.3043	2.04839	2.04839
65	2-chloro-5-methoxypyridine	ClC1=CC=C(OC)C=N1	Cl		95.6149		-58.2781	0	24.2168	-15.5421		0.116837	0	0.0598195	0.36371		92.5508	3.06414	3.06414
66	2-chloro-4-fluoropyridine	ClC1=CC(F)=CC=N1	F		72.5954		-56.8762	0	84.4231	44.0827		0.123491	0	0.757939	0.512581		73.258	0.662591	-0.662591
67	2-chloro-6-fluoropyridine	ClC1=CC=CC(F)=N1	F		74.9861		-39.7112	0	80.2464	44.1187		0.204951	0	0.709508	0.512671		74.0301	0.955955	0.955955
68	2-chloro-3-fluoro-5-methyl-pyridine	ClC1=C(F)C=C(C)C=N1	F		79.3836		-38.2417	0.6276	70.4227	142.547		0.211925	0.06	0.595598	0.758425		83.1007	3.71715	-3.71715
69	2-chloro-3-fluoropyridine	ClC1=C(F)C=CC=N1	F		79.3991		-40.2428	0.8368	79.8346	166.128		0.202428	0.08	0.704733	0.817304		80.9929	1.59379	-1.59379
70	1-bromo-3,5-difluorobenzene	BrC1=CC(F)=CC(F)=C1	F		80.8536		-60.9624	0	63.9978	119.662		0.104099	0	0.521098	0.701286		85.2208	4.36721	-4.36721
71	2-bromo-5-fluoropyridine	BrC1=CC=C(F)C=N1	F		81.2061		-25.5739	0	81.2011	177.914		0.272042	0	0.720579	0.84673		80.356	0.850085	0.850085
72	2-chloro-5-fluoropyridine	ClC1=CC=C(F)C=N2	F		82.1608		-32.0096	0	78.9946	175.284		0.2415	0	0.694993	0.840163		81.3327	0.828143	0.828143
73	1-bromo-4-fluorobenzene	BrC1=CC=C(F)C=C1	F		90.3579		-64.1899	0	43.9798	70.0038		0.0887819	0	0.288981	0.5773		90.1274	0.230505	0.230505
74	1-chloro-4-fluorobenzene	ClC1=CC=C(F)C=C1	F		91.2312		-82.8978	0	42.1158	68.8623		0	0	0.267366	0.57445		91.6228	0.391647	-0.391647
						Max	127.819	10.46	105.299	239.3							All data fit
						Min	-82.8978	0	19.0579	-161.213							MAE All	1.87044
																	MAE Br	1.69972
																	MAE Cl	1.98077
																	MAE F	1.51079
																	R2 All	0.920709
																	R2 Br	0.938386
																	R2 Cl	0.919503
																	R2 F	0.900864

## Sheet: Regression Anal. 60-40 1
Order	Name	SMILES	Halide		Measured ΔG‡SNAr (kJ/mol)	SDM		Electron affinity (EA) (kJ/mol)	ESP1 (kJ/mol)	ESP2 (kJ/mol)		Predicted ΔG‡SNAr (kJ/mol)	Absolute Error (60/40 split)	res2
1	2-bromopyridine	BrC1=CC=CC=N1	Br		86.2187	22.5326		-54.0327	35.5302	-11.3949		88.6071	2.38844	5.70466		SUMMARY OUTPUT - ALL DATA REGRESSION
2	1-bromo-4-nitrobenzene	BrC1=CC=C([N+]([O-])=O)C=C1	Br		78.6143	8.16534		101.577	72.6719	212.671		80.6725	2.05812	4.23586
3	4-chloro-2-(trifluoromethyl)pyridine	ClC1=CC=NC(C(F)(F)F)=C1	Cl		74.37	50.4357		3.08758	88.136	96.1254		72.5318	1.83827	3.37922		Regression Statistics
4	1-bromo-3,5-bis(trifluoromethyl)benzene	BrC1=CC(C(F)(F)F)=CC(C(F)(F)F)=C1	Br		85.9779	20.3041		17.1592	81.7621	239.3		83.0549	2.92294	8.54359		Multiple R	0.959177
5	2,3-dichloro-pyridine	ClC1=C(Cl)C=CC=N1	Cl		81.1258	0.119775		-27.9812	60.0677	49.4302		81.7951	0.669366	0.44805		R Square	0.920021
6	2-bromo-5-methoxypyridine	BrC1=CC=C(OC)C=N1	Br		94.913	180.664		-53.8996	19.0579	-8.78962		94.9818	0.0688348	0.00473822		Adjusted R Square	0.916593
7	2-bromo-5-(trifluoromethyl)pyridine	BrC1=CC=C(C(F)(F)F)C=N1	Br		76.9722	20.2465		55.1137	74.3893	123.515		76.8352	0.137075	0.0187896		Standard Error	2.41629
8	2-chloro-3-cyano-pyridine	ClC1=C(C#N)C=CC=N1	Cl		72.4308	81.7409		49.0154	95.859	150.244		70.6737	1.75703	3.08716		Observations	74
9	2-chloro-6-isopropoxypyridine	ClC1=CC=CC(OC(C)C)=N1	Cl		89.1561	59.0475		-68.5058	25.2033	-38.7837		91.5375	2.38141	5.67112
10	2-chloro-4-cyano-pyridine	ClC1=CC(C#N)=CC=N1	Cl		73.1654	68.9978		69.8566	91.9308	149.603		71.0868	2.07858	4.32049		ANOVA
11	4-chloro-7-methoxyquinoline	ClC1=CC=NC2=CC(OC)=CC=C21	Cl		82.6293	1.3396		13.7976	32.9469	-64.5605		82.9547	0.325429	0.105904			df	SS	MS	F	Significance F
12	4-chloro-6-(pyrrolidin-1-yl)pyrimidine	ClC1=CC(N2CCCC2)=NC=N1	Cl		82.3884	0.840062		-56.9273	22.6528	-161.213		84.3926	2.0042	4.01682		Regression	3	4701.29	1567.1	268.409	2.60438e-38
13	2,6-dichloropyridine	ClC1=CC=CC(Cl)=N1	Cl		77.2025	18.2274		-27.9812	62.5826	49.8303		80.8699	3.66746	13.4503		Residual	70	408.691	5.83845
14	2-(benzyloxy)-4-chloropyridine	ClC1=CC(OCC2=CC=CC=C2)=NC=C1	Cl		86.2294	22.634		-28.22	42.617	-47.4188		82.4365	3.79289	14.386		Total	73	5109.98
15	2-chloro-5-methyl-pyridine	ClC1=CC=C(C)C=N1	Cl		94.2552	163.414		-63.3572	27.5976	-24.9353		91.2309	3.0243	9.14637
16	2-chloro-5-bromo-pyridine	ClC1=CC=C(Br)C=N1	Cl		82.2146	0.551656		-17.3677	61.375	63.4058		81.6365	0.578092	0.334191			Coefficients	Standard Error	t Stat	P-value	Lower 95%	Upper 95%	Lower 95.0%	Upper 95.0%
17	2-chloro-3-methoxypyridine	ClC1=C(OC)C=CC=N1	Cl		94.3527	165.916		-71.357	25.5504	-28.5542		92.1771	2.17561	4.73329		Intercept	99.8026	1.2031	82.9544	1.21841e-71	97.403	102.202	97.403	102.202
18	4-chloro-2-(trifluoromethyl)quinoline	ClC1=CC(C(F)(F)F)=NC2=CC=CC=C21	Cl		69.2354	149.731		69.4706	75.2683	69.5043		72.4687	3.23326	10.454		X Variable 1	-0.0465164	0.00815369	5.70495	2.57697e-07	0.0302544	0.0627784	0.0302544	0.0627784
19	4-bromo-2-cyanopyridine	BrC1=CC=NC(C#N)=C1	Br		70.8426	112.98		54.4187	98.1366	141.966		69.0368	1.80582	3.26098		X Variable 2	-0.373305	0.0202007	-18.4798	1.23726e-28	-0.413594	-0.333016	-0.413594	-0.333016
20	2-bromo-5-methypyridine	BrC1=CC=C(C)C=N1	Br		90.222	76.5652		-56.9273	24.3671	-17.1958		92.6092	2.38716	5.69855		X Variable 3	0.0551648	0.00531198	10.385	8.11662e-16	0.0445704	0.0657592	0.0445704	0.0657592
21	2,4-dichloro-pyridine	ClC1=CC(Cl)=CC=N1	Cl		77.3558	16.9417		-23.1569	71.9774	46.5251		76.8798	0.475981	0.226558
22	2-chloro-4-methyl-pyridine	ClC1=CC(C)=CC=N1	Cl		91.256	95.7293		-67.5409	28.9759	-42.5973		89.8303	1.42568	2.03258
23	4-(6-chloropyrimidin-4-yl)morpholine	ClC1=NC=NC(N2CCOCC2)=C1	Cl		76.897	20.9292		-46.3138	39.2217	-98.4452		81.4733	4.57635	20.9429		SUMMARY OUTPUT - 60/40 #1
24	2-chloro-4-(trifluoromethyl)pyridine	ClC1=CC(C(F)(F)F)=CC=N1	Cl		75.7475	32.7684		14.9555	76.3185	102.229		76.7833	1.03579	1.07285
25	2-chloro-3-bromo-pyridine	ClC1=C(Br)C=CC=N1	Cl		81.0918	0.144449		-23.1569	59.8112	45.9246		81.4375	0.345745	0.11954		Regression Statistics
26	2-chloro-5-cyano-pyridine	ClC1=CC=C(C#N)C=N1	Cl		70.6115	117.946		46.3138	96.677	163.098		71.2897	0.678118	0.459844		Multiple R	0.957517
27	2-chloro-6-(trifluoromethyl)pyridine	ClC1=CC=CC(C(F)(F)F)=N1	Cl		78.9094	6.56621		4.72786	77.8247	100.647		76.6231	2.28632	5.22727		R Square	0.916839
28	2-chloro-5-methoxypyridine	ClC1=CC=C(OC)C=N1	Cl		95.6149	200.026		-58.2781	24.2168	-15.5421		92.8346	2.78035	7.73036		Adjusted R Square	0.910754
29	2-chloro-5-(trifluoromethyl)pyridine	ClC1=CC=C(C(F)(F)F)C=N1	Cl		74.6968	45.9016		0.578922	80.5433	117.45		76.8358	2.13904	4.57551		Standard Error	2.50207
30	3,4,5-trichloro-pyridine	ClC1=CN=CC(Cl)=C1Cl	Cl		72.1837	86.2698		-2.89461	90.1805	108.8		72.8357	0.651992	0.425094		Observations	45
31	2-chloro-6-(tert-butoxy)-pyridine	ClC1=CC=CC(OC(C)(C)C)=N1	Cl		91.6918	104.447		-75.2599	23.2774	-26.1043		93.3794	1.68763	2.8481
32	2-bromo-3-methoxypyridine	BrC1=C(OC)C=CC=N1	Br		92.4118	119.683		-50.0748	34.3974	-2.05861		89.4138	2.99806	8.98834		ANOVA
33	1-bromo-3,5-difluorobenzene	BrC1=CC(F)=CC(F)=C1	F		80.8536	0.382197		-60.9624	63.9978	119.662		86.2652	5.41159	29.2854			df	SS	MS	F	Significance F
34	4-chloro-2-methyl-pyridine	CC1=CC(Cl)=CC=N1	Cl		87.7737	39.7128		-58.8571	39.3211	-45.5314		85.3131	2.46057	6.05441		Regression	3	2829.79	943.265	150.672	3.60251e-22
35	2-chloro-6-methoxypyridine	ClC1=CC=CC(OC)=N1	Cl		88.5591	50.2286		-73.0418	29.0914	-30.5432		90.8007	2.24166	5.02502		Residual	41	256.675	6.26037
36	2-chloro-6-cyano-pyridine	ClC1=CC=CC(C#N)=N1	Cl		73.9494	56.5876		54.5152	91.9131	147.579		71.7279	2.22151	4.93512		Total	44	3086.47
37	4-(benzyloxy)-2-chloropyridine	ClC1=CC(OCC2=CC=CC=C2)=CC=N1	Cl		90.5979	83.2857		-40.815	30.2467	-45.7932		87.8314	2.76653	7.65371
38	4,6-dichloro-2-methylpyrimidine	ClC1=NC(C)=NC(Cl)=C1	Cl		67.8169	186.456		-2.25973	86.0815	-0.8368		67.6044	0.21258	0.0451904			Coefficients	Standard Error	t Stat	P-value	Lower 95%	Upper 95%	Lower 95.0%	Upper 95.0%
39	2-chloro-6-bromo-pyridine	BrC1=CC=CC(Cl)=N1	Cl		76.6031	23.7043		-21.2271	64.0013	54.8608		80.3097	3.70652	13.7383		Intercept	100.054	1.75111	57.1371	1.02988e-40	96.5172	103.59	96.5172	103.59
40	2-chloro-5-nitropyridine	ClC1=CC=C([N+]([O-])=O)C=N1	Cl		64.0292	304.246		123.214	105.299	196.458		66.2823	2.25308	5.07636		X Variable 1	-0.0494738	0.0131202	3.77081	0.000514356	0.022977	0.0759706	0.022977	0.0759706
41	2-chloro-6-methyl-pyridine	ClC1=CC=CC(C)=N1	Cl		90.608	83.4687		-62.7165	29.5297	-41.1327		89.4726	1.13537	1.28906		X Variable 2	-0.37766	0.0303647	-12.4375	1.68345e-15	-0.438983	-0.316337	-0.438983	-0.316337
42	2-chloro-3-methyl-pyridine	ClC1=C(C)C=CC=N1	Cl		90.828	87.5376		-68.5058	34.386	-28.5343		88.7004	2.1276	4.52668		X Variable 3	0.0615482	0.00772245	7.97004	7.29619e-10	0.0459524	0.077144	0.0459524	0.077144
43	4-chloro-pyridine-2-carboxamide	ClC1=CC=NC(C(N)=O)=C1	Cl		79.7811	2.85874		-5.69273	70.8151	25.1874		75.1414	4.63962	21.526
44	4-chloro-2-(methylthio)pyrimidine	CSC1=NC=CC(Cl)=N1	Cl		71.6882	95.7195		-16.7801	67.6649	-38.0744		72.9861	1.29784	1.6844
45	2-chloro-5-fluoropyridine	ClC1=CC=C(F)C=N2	F		82.1608	0.474674		-32.0096	78.9946	175.284		82.5925	0.431734	0.186394
46	2-chloro-6-fluoropyridine	ClC1=CC=CC(F)=N1	F		74.9861	42.065		-39.7112	80.2464	44.1187		74.4278	0.558254	0.311647
47	2-bromo-5-fluoropyridine	BrC1=CC=C(F)C=N1	F		81.2061	0.0706399		-25.5739	81.2011	177.914		81.6027	0.396639	0.157322
48	4-chloro-3-bromo-pyridine	BrC1=CN=CC=C1Cl	Cl		76.6235	23.5063		-25.0866	70.9904	42.0862		77.0748	0.451322	0.203691
49	4-chloro-6-(trifluoromethyl)quinoline	ClC1=CC=NC2=CC=C(C(F)(F)F)C=C21	Cl		69.9828	131.998		74.295	74.1677	59.3797		72.0225	2.03969	4.16034
50	2-chloro-5-(1,3-dioxolan-2-yl)pyridine	ClC1=CC=C(C2OCCO2)C=N1	Cl		84.7752	10.9122		-45.3489	29.8655	-32.6442		89.009	4.23377	17.9248
51	2-bromo-3-(trifluoromethyl)pyridine	BrC1=C(C(F)(F)F)C=CC=N1	Br		76.9183	20.7352		6.48393	74.4146	110.57		78.4348	1.51652	2.29982
52	2-chloro-4-fluoropyridine	ClC1=CC(F)=CC=N1	F		72.5954	78.7917		-56.8762	84.4231	44.0827		73.6975	1.10209	1.2146
53	2-chloro-4,6-dimethyl-3-cyano-pyridine	ClC1=C(C#N)C(C)=CC(C)=N1	Cl		71.4942	99.5526		24.6042	74.3952	96.1142		76.6559	5.16167	26.6428
54	1-chloro-4-fluorobenzene	ClC1=CC=C(F)C=C1	F		91.2312	95.245		-82.8978	42.1158	68.8623		92.4878	1.25658	1.579
55	4-chloro-6,7-dimethoxyquinoline	ClC1=CC=NC2=CC(OC)=C(OC)C=C21	Cl		87.58	37.3092		3.66651	21.6297	-97.3361		85.7127	1.86731	3.48685
56	2-chloro-3-fluoropyridine	ClC1=C(F)C=CC=N1	F		79.3991	4.29636		-40.2428	79.8346	166.128		82.1192	2.72008	7.39882
57	2-chloro-3-fluoro-5-methyl-pyridine	ClC1=C(F)C=C(C)C=N1	F		79.3836	4.36078		-38.2417	70.4227	142.547		84.1232	4.73962	22.464
58	2,5-dibromo-pyridine	BrC1=CC=C(Br)C=N1	Br		81.9831	0.261431		-11.3565	57.0993	68.6556		83.2769	1.2938	1.67392
59	2,4-dichloropyrimidine	ClC1=NC(Cl)=CC=N1	Cl		61.3806	403.658		12.6301	101.171	17.2963		62.2851	0.904491	0.818104
60	4,6-dichloropyrimidine	ClC1=CC(Cl)=NC=N1	Cl		62.034	377.83		4.61787	99.1485	24.3398		63.8788	1.84478	3.40321
61	2-chloro-3-(trifluoromethyl)pyridine	ClC1=C(C(F)(F)F)C=CC=N1	Cl		77.6887	14.3121		-5.01732	77.1838	105.185		77.6266	0.0621313	0.00386029
62	4-bromo-2-chloro-pyridine	ClC1=CC(Br)=CC=N1	Br		76.9948	20.0437		-16.4028	68.4263	48.2352		77.992	0.997197	0.994403
63	2-chloro-6-methyl-4 (trifluoromethyl)pyridine	ClC1=CC(C(F)(F)F)=CC(C)=N1	Cl		77.1792	18.4264		-4.72786	66.4097	76.6996		79.9279	2.74869	7.55527
64	2-bromo-3-cyanopyridine	BrC1=C(C#N)C=CC=N1	Br		73.0073	71.6482		52.4889	88.8284	150.752		73.1884	0.181072	0.0327872
65	4-chloro-2-methylpyrimidine	ClC1=CC=NC(C)=N1	Cl		73.2717	67.2419		-31.8407	68.0204	-60.3884		72.2235	1.04822	1.09876
66	4-chloro-quinoline	ClC1=CC=NC2=CC=CC=C21	Cl		79.8819	2.52805		27.3058	44.2789	-33.895		79.8941	0.0122773	0.000150731			2.40783	RMSE all
67	4-chloro-N-Methylpyridine-2-carboxamide	ClC1=CC=NC(C(NC)=O)=C1	Cl		80.5058	0.933248		8.10491	68.4744	1.88556		73.9086	6.59716	43.5225			172.35	PRESS test
68	2,5-dichloro-pyridine	ClC1=CC=C(Cl)C=N1	Cl		83.0415	2.46375		-22.192	60.398	65.0997		82.3484	0.69309	0.480374			5.9431	PRESS-test/n-test
69	2-bromo-5-nitropyridine	BrC1=CC=C([N+]([O-])=O)C=N1	Br		64.3555	292.969		127.819	98.6601	200.298		68.7979	4.44241	19.735
70	2-bromo-5-cyanopyridine	BrC1=CC=C(C#N)C=N1	Br		72.2835	84.4262		52.7813	90.676	166.995		73.4759	1.19239	1.42179			81.4718	Training mean
71	2-chloro-pyridine	ClC1=CC=CC=N1	Cl		88.8	53.7019		-60.7868	38.8165	-18.3374		87.2729	1.5271	2.33205			3086.47	TSS-training
72	3,4-dichloro-pyridine	ClC1=CN=CC=C1Cl	Cl		76.7622	22.181		-28.9461	71.4814	46.3825		77.3448	0.582605	0.339428			68.5882	TSS-training/n-training
73	2-chloro-3-nitropyridine	ClC1=C([N+]([O-])=O)C=CC=N1	Cl		67.7304	188.828		113.855	101.824	176.895		66.8535	0.876909	0.768969
74	1-bromo-4-fluorobenzene	BrC1=CC=C(F)C=C1	F		90.3579	78.9621		-64.1899	43.9798	70.0038		90.9285	0.570605	0.325591			0.913351	Q2
																	0.91774	R2 all
												MAE all	1.93108				0.916839	R2 training
												MAE training	2.02848				0.910396	R2 test
												MAE test	1.77995

## Sheet: Regression Anal. 60-40 2
Order	Name	SMILES	Halide		Measured ΔG‡SNAr (kJ/mol)	SDM		Electron affinity (EA) (kJ/mol)	ESP1 (kJ/mol)	ESP2 (kJ/mol)		Predicted ΔG‡SNAr (kJ/mol)	Absolute Error (60/40 split)	res2
1	2-bromo-3-methoxypyridine	BrC1=C(OC)C=CC=N1	Br		92.4118	126.366		-50.0748	34.3974	-2.05861		89.9318	2.48001	6.15046		SUMMARY OUTPUT - ALL DATA REGRESSION
2	2-chloro-5-(trifluoromethyl)pyridine	ClC1=CC=C(C(F)(F)F)C=N1	Cl		74.6968	41.9097		0.578922	80.5433	117.45		76.6878	1.99098	3.96401
3	2-chloro-6-methyl-pyridine	ClC1=CC=CC(C)=N1	Cl		90.608	89.065		-62.7165	29.5297	-41.1327		90.1407	0.467302	0.218371		Regression Statistics
4	4-chloro-2-(trifluoromethyl)quinoline	ClC1=CC(C(F)(F)F)=NC2=CC=CC=C21	Cl		69.2354	142.448		69.4706	75.2683	69.5043		72.5475	3.31211	10.9701		Multiple R	0.959177
5	2-chloro-5-methyl-pyridine	ClC1=CC=C(C)C=N1	Cl		94.2552	171.208		-63.3572	27.5976	-24.9353		91.8605	2.39469	5.73455		R Square	0.920021
6	2-bromo-3-(trifluoromethyl)pyridine	BrC1=C(C(F)(F)F)C=CC=N1	Br		76.9183	18.0819		6.48393	74.4146	110.57		78.3538	1.43555	2.06081		Adjusted R Square	0.916593
7	4-bromo-2-chloro-pyridine	ClC1=CC(Br)=CC=N1	Br		76.9948	17.4366		-16.4028	68.4263	48.2352		78.1367	1.14186	1.30385		Standard Error	2.41629
8	1-bromo-3,5-bis(trifluoromethyl)benzene	BrC1=CC(C(F)(F)F)=CC(C(F)(F)F)=C1	Br		85.9779	23.1103		17.1592	81.7621	239.3		82.5217	3.45614	11.9449		Observations	74
9	2-bromo-5-methoxypyridine	BrC1=CC=C(OC)C=N1	Br		94.913	188.855		-53.8996	19.0579	-8.78962		95.6241	0.711078	0.505633
10	2-chloro-5-cyano-pyridine	ClC1=CC=C(C#N)C=N1	Cl		70.6115	111.493		46.3138	96.677	163.098		70.9123	0.300729	0.0904377		ANOVA
11	2-chloro-4-fluoropyridine	ClC1=CC(F)=CC=N1	F		72.5954	73.5335		-56.8762	84.4231	44.0827		73.7229	1.12755	1.27137			df	SS	MS	F	Significance F
12	2-chloro-3-methoxypyridine	ClC1=C(OC)C=CC=N1	Cl		94.3527	173.769		-71.357	25.5504	-28.5542		92.8277	1.52503	2.32573		Regression	3	4701.29	1567.1	268.409	2.60438e-38
13	4-chloro-2-(trifluoromethyl)pyridine	ClC1=CC=NC(C(F)(F)F)=C1	Cl		74.37	46.2469		3.08758	88.136	96.1254		72.4007	1.96932	3.87824		Residual	70	408.691	5.83845
14	2-chloro-4-(trifluoromethyl)pyridine	ClC1=CC(C(F)(F)F)=CC=N1	Cl		75.7475	29.4097		14.9555	76.3185	102.229		76.7205	0.972994	0.946717		Total	73	5109.98
15	1-chloro-4-fluorobenzene	ClC1=CC=C(F)C=C1	F		91.2312	101.217		-82.8978	42.1158	68.8623		92.7097	1.47852	2.18601
16	2-bromo-5-(trifluoromethyl)pyridine	BrC1=CC=C(C(F)(F)F)C=N1	Br		76.9722	17.6258		55.1137	74.3893	123.515		76.7408	0.231461	0.0535743			Coefficients	Standard Error	t Stat	P-value	Lower 95%	Upper 95%	Lower 95.0%	Upper 95.0%
17	2,5-dichloro-pyridine	ClC1=CC=C(Cl)C=N1	Cl		83.0415	3.50041		-22.192	60.398	65.0997		82.4913	0.550167	0.302684		Intercept	99.8026	1.2031	82.9544	1.21841e-71	97.403	102.202	97.403	102.202
18	2-chloro-6-methyl-4 (trifluoromethyl)pyridine	ClC1=CC(C(F)(F)F)=CC(C)=N1	Cl		77.1792	15.9305		-4.72786	66.4097	76.6996		80.0028	2.82354	7.97236		X Variable 1	-0.0465164	0.00815369	5.70495	2.57697e-07	0.0302544	0.0627784	0.0302544	0.0627784
19	4-chloro-6,7-dimethoxyquinoline	ClC1=CC=NC2=CC(OC)=C(OC)C=C21	Cl		87.58	41.0808		3.66651	21.6297	-97.3361		86.6504	0.929604	0.864164		X Variable 2	-0.373305	0.0202007	-18.4798	1.23726e-28	-0.413594	-0.333016	-0.413594	-0.333016
20	2-chloro-5-methoxypyridine	ClC1=CC=C(OC)C=N1	Cl		95.6149	208.64		-58.2781	24.2168	-15.5421		93.4604	2.1545	4.64188		X Variable 3	0.0551648	0.00531198	10.385	8.11662e-16	0.0445704	0.0657592	0.0445704	0.0657592
21	3,4-dichloro-pyridine	ClC1=CN=CC=C1Cl	Cl		76.7622	19.4337		-28.9461	71.4814	46.3825		77.4673	0.705146	0.497231
22	2-chloro-6-bromo-pyridine	BrC1=CC=CC(Cl)=N1	Cl		76.6031	20.8612		-21.2271	64.0013	54.8608		80.4609	3.85776	14.8823
23	2-bromo-5-fluoropyridine	BrC1=CC=C(F)C=N1	F		81.2061	0.00126177		-25.5739	81.2011	177.914		81.2438	0.03771	0.00142205		SUMMARY OUTPUT - 60/40 #2
24	2-chloro-3-bromo-pyridine	ClC1=C(Br)C=CC=N1	Cl		81.0918	0.00620327		-23.1569	59.8112	45.9246		81.6447	0.552907	0.305706
25	2-chloro-3-cyano-pyridine	ClC1=C(C#N)C=CC=N1	Cl		72.4308	76.3835		49.0154	95.859	150.244		70.3442	2.08656	4.35374		Regression Statistics
26	2-chloro-4-methyl-pyridine	ClC1=CC(C)=CC=N1	Cl		91.256	101.716		-67.5409	28.9759	-42.5973		90.5041	0.751906	0.565363		Multiple R	0.969172
27	2-bromo-3-cyanopyridine	BrC1=C(C#N)C=CC=N1	Br		73.0073	66.6382		52.4889	88.8284	150.752		72.9073	0.0999723	0.00999446		R Square	0.939295
28	2-bromo-5-methypyridine	BrC1=CC=C(C)C=N1	Br		90.222	81.9289		-56.9273	24.3671	-17.1958		93.24	3.01799	9.10825		Adjusted R Square	0.934854
29	4-chloro-2-(methylthio)pyrimidine	CSC1=NC=CC(Cl)=N1	Cl		71.6882	89.9146		-16.7801	67.6649	-38.0744		73.4092	1.72102	2.96191		Standard Error	2.10273
30	2,3-dichloro-pyridine	ClC1=C(Cl)C=CC=N1	Cl		81.1258	0.00200546		-27.9812	60.0677	49.4302		81.9867	0.860941	0.74122		Observations	45
31	2,4-dichloropyrimidine	ClC1=NC(Cl)=CC=N1	Cl		61.3806	391.642		12.6301	101.171	17.2963		62.32	0.939376	0.882427
32	3,4,5-trichloro-pyridine	ClC1=CN=CC(Cl)=C1Cl	Cl		72.1837	80.7635		-2.89461	90.1805	108.8		72.6471	0.463397	0.214737		ANOVA
33	2-chloro-pyridine	ClC1=CC=CC=N1	Cl		88.8	58.2086		-60.7868	38.8165	-18.3374		87.8062	0.993774	0.987586			df	SS	MS	F	Significance F
34	4-chloro-2-methyl-pyridine	CC1=CC(Cl)=CC=N1	Cl		87.7737	43.6011		-58.8571	39.3211	-45.5314		85.9302	1.84343	3.39823		Regression	3	2804.99	934.996	211.467	5.74455e-25
35	2,4-dichloro-pyridine	ClC1=CC(Cl)=CC=N1	Cl		77.3558	14.5522		-23.1569	71.9774	46.5251		77.0018	0.354022	0.125332		Residual	41	181.28	4.42148
36	4-chloro-N-Methylpyridine-2-carboxamide	ClC1=CC=NC(C(NC)=O)=C1	Cl		80.5058	0.441885		8.10491	68.4744	1.88556		74.2137	6.29212	39.5907		Total	44	2986.27
37	2-bromopyridine	BrC1=CC=CC=N1	Br		86.2187	25.4839		-54.0327	35.5302	-11.3949		89.1448	2.92608	8.56196
38	4-chloro-quinoline	ClC1=CC=NC2=CC=CC=C21	Cl		79.8819	1.6607		27.3058	44.2789	-33.895		80.4891	0.607199	0.36869			Coefficients	Standard Error	t Stat	P-value	Lower 95%	Upper 95%	Lower 95.0%	Upper 95.0%
39	2-chloro-4-cyano-pyridine	ClC1=CC(C#N)=CC=N1	Cl		73.1654	64.0831		69.8566	91.9308	149.603		70.7979	2.36743	5.60471		Intercept	100.829	1.28132	78.6911	2.31541e-46	98.2412	103.417	98.2412	103.417
40	2-chloro-3-methyl-pyridine	ClC1=C(C)C=CC=N1	Cl		90.828	93.2664		-68.5058	34.386	-28.5343		89.292	1.53597	2.35921		X Variable 1	-0.0489097	0.0102693	4.76273	2.39797e-05	0.0281706	0.0696489	0.0281706	0.0696489
41	2-chloro-6-isopropoxypyridine	ClC1=CC=CC(OC(C)C)=N1	Cl		89.1561	63.7688		-68.5058	25.2033	-38.7837		92.2245	3.06839	9.41502		X Variable 2	-0.384507	0.0217939	-17.6428	9.32329e-21	-0.428521	-0.340493	-0.428521	-0.340493
42	2-chloro-6-(trifluoromethyl)pyridine	ClC1=CC=CC(C(F)(F)F)=N1	Cl		78.9094	5.11283		4.72786	77.8247	100.647		76.5492	2.36018	5.57046		X Variable 3	0.0583792	0.00676731	8.62665	9.29331e-11	0.0447124	0.0720461	0.0447124	0.0720461
43	1-bromo-4-nitrobenzene	BrC1=CC=C([N+]([O-])=O)C=C1	Br		78.6143	6.53417		101.577	72.6719	212.671		80.3335	1.71917	2.95554
44	2-chloro-5-bromo-pyridine	ClC1=CC=C(Br)C=N1	Cl		82.2146	1.09002		-17.3677	61.375	63.4058		81.7808	0.433769	0.188156
45	2-chloro-6-fluoropyridine	ClC1=CC=CC(F)=N1	F		74.9861	38.2474		-39.7112	80.2464	44.1187		74.4915	0.494624	0.244653
46	4-bromo-2-cyanopyridine	BrC1=CC=NC(C#N)=C1	Br		70.8426	106.666		54.4187	98.1366	141.966		68.721	2.12166	4.50146
47	4-chloro-2-methylpyrimidine	ClC1=CC=NC(C)=N1	Cl		73.2717	62.3913		-31.8407	68.0204	-60.3884		72.7065	0.565255	0.319513
48	4-chloro-3-bromo-pyridine	BrC1=CN=CC=C1Cl	Cl		76.6235	20.6755		-25.0866	70.9904	42.0862		77.2165	0.593017	0.351669
49	2,5-dibromo-pyridine	BrC1=CC=C(Br)C=N1	Br		81.9831	0.660329		-11.3565	57.0993	68.6556		83.4373	1.45415	2.11456
50	4-(benzyloxy)-2-chloropyridine	ClC1=CC(OCC2=CC=CC=C2)=CC=N1	Cl		90.5979	88.8759		-40.815	30.2467	-45.7932		88.5217	2.07625	4.31083
51	2-chloro-3-nitropyridine	ClC1=C([N+]([O-])=O)C=CC=N1	Cl		67.7304	180.638		113.855	101.824	176.895		66.4352	1.29516	1.67745
52	2-chloro-3-fluoropyridine	ClC1=C(F)C=CC=N1	F		79.3991	3.13809		-40.2428	79.8346	166.128		81.7987	2.39958	5.75798
53	4-chloro-6-(trifluoromethyl)quinoline	ClC1=CC=NC2=CC=C(C(F)(F)F)C=C21	Cl		69.9828	125.166		74.295	74.1677	59.3797		72.1437	2.16089	4.66943
54	2-chloro-6-methoxypyridine	ClC1=CC=CC(OC)=N1	Cl		88.5591	54.5901		-73.0418	29.0914	-30.5432		91.4324	2.87334	8.25609
55	4,6-dichloropyrimidine	ClC1=CC(Cl)=NC=N1	Cl		62.034	366.207		4.61787	99.1485	24.3398		63.9007	1.86667	3.48446
56	2-chloro-5-fluoropyridine	ClC1=CC=C(F)C=N2	F		82.1608	0.980633		-32.0096	78.9946	175.284		82.2534	0.0926184	0.00857817
57	4-chloro-7-methoxyquinoline	ClC1=CC=NC2=CC(OC)=CC=C21	Cl		82.6293	2.12785		13.7976	32.9469	-64.5605		83.7168	1.0875	1.18265
58	4-chloro-6-(pyrrolidin-1-yl)pyrimidine	ClC1=CC(N2CCCC2)=NC=N1	Cl		82.3884	1.48316		-56.9273	22.6528	-161.213		85.4915	3.10315	9.62953
59	4-(6-chloropyrimidin-4-yl)morpholine	ClC1=NC=NC(N2CCOCC2)=C1	Cl		76.897	18.2631		-46.3138	39.2217	-98.4452		82.2659	5.36893	28.8254
60	4-chloro-pyridine-2-carboxamide	ClC1=CC=NC(C(N)=O)=C1	Cl		79.7811	1.93064		-5.69273	70.8151	25.1874		75.3488	4.43223	19.6447
61	2,6-dichloropyridine	ClC1=CC=CC(Cl)=N1	Cl		77.2025	15.7455		-27.9812	62.5826	49.8303		81.043	3.84055	14.7498
62	4,6-dichloro-2-methylpyrimidine	ClC1=NC(C)=NC(Cl)=C1	Cl		67.8169	178.319		-2.25973	86.0815	-0.8368		67.7916	0.0253146	0.000640828
63	2-chloro-6-cyano-pyridine	ClC1=CC=CC(C#N)=N1	Cl		73.9494	52.1453		54.5152	91.9131	147.579		71.4369	2.51248	6.31255
64	2-chloro-3-fluoro-5-methyl-pyridine	ClC1=C(F)C=C(C)C=N1	F		79.3836	3.19317		-38.2417	70.4227	142.547		83.943	4.55942	20.7883
65	2-bromo-5-nitropyridine	BrC1=CC=C([N+]([O-])=O)C=N1	Br		64.3555	282.745		127.819	98.6601	200.298		68.3351	3.97953	15.8367
66	2-(benzyloxy)-4-chloropyridine	ClC1=CC(OCC2=CC=CC=C2)=NC=C1	Cl		86.2294	25.5917		-28.22	42.617	-47.4188		83.0543	3.17505	10.081			2.41729	RMSE all
67	1-bromo-4-fluorobenzene	BrC1=CC=C(F)C=C1	F		90.3579	84.4076		-64.1899	43.9798	70.0038		91.1446	0.786712	0.618916			251.123	PRESS test
68	2-bromo-5-cyanopyridine	BrC1=CC=C(C#N)C=N1	Br		72.2835	78.98		52.7813	90.676	166.995		73.1309	0.847383	0.718058			8.65941	PRESS-test/n-test
69	2-chloro-5-(1,3-dioxolan-2-yl)pyridine	ClC1=CC=C(C2OCCO2)C=N1	Cl		84.7752	12.9937		-45.3489	29.8655	-32.6442		89.6576	4.88244	23.8382
70	2-chloro-5-nitropyridine	ClC1=CC=C([N+]([O-])=O)C=N1	Cl		64.0292	293.826		123.214	105.299	196.458		65.7835	1.75432	3.07763			81.1705	Training mean
71	2-chloro-6-(tert-butoxy)-pyridine	ClC1=CC=CC(OC(C)(C)C)=N1	Cl		91.6918	110.696		-75.2599	23.2774	-26.1043		94.0356	2.34381	5.49343			2986.27	TSS-training
72	1-bromo-3,5-difluorobenzene	BrC1=CC(F)=CC(F)=C1	F		80.8536	0.100437		-60.9624	63.9978	119.662		86.1887	5.3351	28.4632			66.3615	TSS-training/n-training
73	2-chloro-3-(trifluoromethyl)pyridine	ClC1=C(C(F)(F)F)C=CC=N1	Cl		77.6887	12.1231		-5.01732	77.1838	105.185		77.5372	0.151482	0.0229467
74	2-chloro-4,6-dimethyl-3-cyano-pyridine	ClC1=C(C#N)C(C)=CC(C)=N1	Cl		71.4942	93.6309		24.6042	74.3952	96.1142		76.6311	5.13686	26.3874			0.869512	Q2
																	0.91987	R2 all
												MAE all	1.92385				0.939295	R2 training
												MAE training	1.58987				0.901975	R2 test
												MAE test	2.4421

## Sheet: Regression Anal. 60-40 3
Order	Name	SMILES	Halide		Measured ΔG‡SNAr (kJ/mol)	SDM		Electron affinity (EA) (kJ/mol)	ESP1 (kJ/mol)	ESP2 (kJ/mol)		Predicted ΔG‡SNAr (kJ/mol)	Absolute Error (60/40 split)	res2
1	1-bromo-3,5-difluorobenzene	BrC1=CC(F)=CC(F)=C1	F		80.8536	1.57076		-60.9624	63.9978	119.662		85.0199	4.16624	17.3575		SUMMARY OUTPUT - ALL DATA REGRESSION
2	2-bromo-5-(trifluoromethyl)pyridine	BrC1=CC=C(C(F)(F)F)C=N1	Br		76.9722	6.90688		55.1137	74.3893	123.515		76.4795	0.492726	0.242779
3	4-chloro-3-bromo-pyridine	BrC1=CN=CC=C1Cl	Cl		76.6235	8.86141		-25.0866	70.9904	42.0862		76.3481	0.275431	0.0758625		Regression Statistics
4	1-chloro-4-fluorobenzene	ClC1=CC=C(F)C=C1	F		91.2312	135.277		-82.8978	42.1158	68.8623		91.352	0.120837	0.0146016		Multiple R	0.959177
5	2-bromo-3-methoxypyridine	BrC1=C(OC)C=CC=N1	Br		92.4118	164.134		-50.0748	34.3974	-2.05861		88.83	3.5818	12.8293		R Square	0.920021
6	3,4-dichloro-pyridine	ClC1=CN=CC=C1Cl	Cl		76.7622	8.0551		-28.9461	71.4814	46.3825		76.569	0.19319	0.0373222		Adjusted R Square	0.916593
7	1-bromo-3,5-bis(trifluoromethyl)benzene	BrC1=CC(C(F)(F)F)=CC(C(F)(F)F)=C1	Br		85.9779	40.6729		17.1592	81.7621	239.3		81.9561	4.02174	16.1744		Standard Error	2.41629
8	2-chloro-6-fluoropyridine	ClC1=CC=CC(F)=N1	F		74.9861	21.2911		-39.7112	80.2464	44.1187		73.5224	1.46371	2.14246		Observations	74
9	3,4,5-trichloro-pyridine	ClC1=CN=CC(Cl)=C1Cl	Cl		72.1837	55.0064		-2.89461	90.1805	108.8		71.9628	0.220862	0.0487801
10	2-chloro-4-methyl-pyridine	ClC1=CC(C)=CC=N1	Cl		91.256	135.854		-67.5409	28.9759	-42.5973		89.2681	1.98792	3.95181		ANOVA
11	4,6-dichloropyrimidine	ClC1=CC(Cl)=NC=N1	Cl		62.034	308.576		4.61787	99.1485	24.3398		63.3022	1.26823	1.60841			df	SS	MS	F	Significance F
12	2-chloro-3-fluoropyridine	ClC1=C(F)C=CC=N1	F		79.3991	0.0405001		-40.2428	79.8346	166.128		80.802	1.40288	1.96806		Regression	3	4701.29	1567.1	268.409	2.60438e-38
13	2-chloro-6-methyl-4 (trifluoromethyl)pyridine	ClC1=CC(C(F)(F)F)=CC(C)=N1	Cl		77.1792	5.86164		-4.72786	66.4097	76.6996		79.2785	2.09929	4.40703		Residual	70	408.691	5.83845
14	2-chloro-4-cyano-pyridine	ClC1=CC(C#N)=CC=N1	Cl		73.1654	41.4089		69.8566	91.9308	149.603		70.6689	2.49646	6.23233		Total	73	5109.98
15	2-chloro-5-methoxypyridine	ClC1=CC=C(OC)C=N1	Cl		95.6149	256.467		-58.2781	24.2168	-15.5421		92.2843	3.33062	11.093
16	2,6-dichloropyridine	ClC1=CC=CC(Cl)=N1	Cl		77.2025	5.74963		-27.9812	62.5826	49.8303		80.1395	2.93706	8.62632			Coefficients	Standard Error	t Stat	P-value	Lower 95%	Upper 95%	Lower 95.0%	Upper 95.0%
17	2-bromo-5-cyanopyridine	BrC1=CC=C(C#N)C=N1	Br		72.2835	53.5363		52.7813	90.676	166.995		72.8653	0.581822	0.338517		Intercept	99.8026	1.2031	82.9544	1.21841e-71	97.403	102.202	97.403	102.202
18	2-chloro-6-bromo-pyridine	BrC1=CC=CC(Cl)=N1	Cl		76.6031	8.98312		-21.2271	64.0013	54.8608		79.6104	3.00727	9.04365		X Variable 1	-0.0465164	0.00815369	5.70495	2.57697e-07	0.0302544	0.0627784	0.0302544	0.0627784
19	4-bromo-2-chloro-pyridine	ClC1=CC(Br)=CC=N1	Br		76.9948	6.78862		-16.4028	68.4263	48.2352		77.3305	0.335723	0.11271		X Variable 2	-0.373305	0.0202007	-18.4798	1.23726e-28	-0.413594	-0.333016	-0.413594	-0.333016
20	2-chloro-6-isopropoxypyridine	ClC1=CC=CC(OC(C)C)=N1	Cl		89.1561	91.3125		-68.5058	25.2033	-38.7837		90.9752	1.81917	3.30936		X Variable 3	0.0551648	0.00531198	10.385	8.11662e-16	0.0445704	0.0657592	0.0445704	0.0657592
21	2-chloro-4-(trifluoromethyl)pyridine	ClC1=CC(C(F)(F)F)=CC=N1	Cl		75.7475	14.8445		14.9555	76.3185	102.229		76.1564	0.408904	0.167202
22	2,5-dibromo-pyridine	BrC1=CC=C(Br)C=N1	Br		81.9831	5.67785		-11.3565	57.0993	68.6556		82.651	0.667852	0.446027
23	4-chloro-2-methylpyrimidine	ClC1=CC=NC(C)=N1	Cl		73.2717	40.0511		-31.8407	68.0204	-60.3884		71.8013	1.47044	2.1622		SUMMARY OUTPUT - 60/40 #3
24	4-chloro-7-methoxyquinoline	ClC1=CC=NC2=CC(OC)=CC=C21	Cl		82.6293	9.17443		13.7976	32.9469	-64.5605		83.1169	0.487671	0.237823
25	4-chloro-2-(trifluoromethyl)pyridine	ClC1=CC=NC(C(F)(F)F)=C1	Cl		74.37	27.3559		3.08758	88.136	96.1254		71.7622	2.60785	6.80087		Regression Statistics
26	2-chloro-4-fluoropyridine	ClC1=CC(F)=CC=N1	F		72.5954	49.0693		-56.8762	84.4231	44.0827		72.6272	0.031816	0.00101226		Multiple R	0.957426
27	2,5-dichloro-pyridine	ClC1=CC=C(Cl)C=N1	Cl		83.0415	11.8415		-22.192	60.398	65.0997		81.6266	1.41486	2.00183		R Square	0.916664
28	4-(6-chloropyrimidin-4-yl)morpholine	ClC1=NC=NC(N2CCOCC2)=C1	Cl		76.897	7.30795		-46.3138	39.2217	-98.4452		81.2177	4.32074	18.6688		Adjusted R Square	0.910566
29	4-chloro-6-(pyrrolidin-1-yl)pyrimidine	ClC1=CC(N2CCCC2)=NC=N1	Cl		82.3884	7.77333		-56.9273	22.6528	-161.213		84.3512	1.96276	3.85241		Standard Error	2.48636
30	2-chloro-6-methoxypyridine	ClC1=CC=CC(OC)=N1	Cl		88.5591	80.2589		-73.0418	29.0914	-30.5432		90.1519	1.59283	2.53712		Observations	45
31	4-chloro-quinoline	ClC1=CC=NC2=CC=CC=C21	Cl		79.8819	0.0792631		27.3058	44.2789	-33.895		80.0028	0.120889	0.0146141
32	4-chloro-pyridine-2-carboxamide	ClC1=CC=NC(C(N)=O)=C1	Cl		79.7811	0.0326674		-5.69273	70.8151	25.1874		74.6328	5.1483	26.505		ANOVA
33	2-chloro-3-cyano-pyridine	ClC1=C(C#N)C=CC=N1	Cl		72.4308	51.4024		49.0154	95.859	150.244		70.0597	2.37103	5.62179			df	SS	MS	F	Significance F
34	4-chloro-6-(trifluoromethyl)quinoline	ClC1=CC=NC2=CC=C(C(F)(F)F)C=C21	Cl		69.9828	92.4969		74.295	74.1677	59.3797		72.042	2.05919	4.24026		Regression	3	2787.95	929.318	150.327	3.76083e-22
35	2,4-dichloropyrimidine	ClC1=NC(Cl)=CC=N1	Cl		61.3806	331.958		12.6301	101.171	17.2963		61.7873	0.406709	0.165412		Residual	41	253.461	6.18196
36	2-chloro-5-methyl-pyridine	ClC1=CC=C(C)C=N1	Cl		94.2552	214.765		-63.3572	27.5976	-24.9353		90.6516	3.60364	12.9862		Total	44	3041.41
37	2-chloro-5-(1,3-dioxolan-2-yl)pyridine	ClC1=CC=C(C2OCCO2)C=N1	Cl		84.7752	26.7795		-45.3489	29.8655	-32.6442		88.592	3.81674	14.5675
38	4-chloro-6,7-dimethoxyquinoline	ClC1=CC=NC2=CC(OC)=C(OC)C=C21	Cl		87.58	63.6748		3.66651	21.6297	-97.3361		85.9635	1.61651	2.61311			Coefficients	Standard Error	t Stat	P-value	Lower 95%	Upper 95%	Lower 95.0%	Upper 95.0%
39	4-chloro-2-methyl-pyridine	CC1=CC(Cl)=CC=N1	Cl		87.7737	66.8034		-58.8571	39.3211	-45.5314		84.7756	2.99809	8.98856		Intercept	100.066	1.52665	65.5462	3.92587e-43	96.9832	103.15	96.9832	103.15
40	4-bromo-2-cyanopyridine	BrC1=CC=NC(C#N)=C1	Br		70.8426	76.6972		54.4187	98.1366	141.966		68.4827	2.35989	5.56906		X Variable 1	-0.0412047	0.010609	3.88394	0.000366924	0.0197794	0.06263	0.0197794	0.06263
41	2-chloro-6-(tert-butoxy)-pyridine	ClC1=CC=CC(OC(C)(C)C)=N1	Cl		91.6918	146.203		-75.2599	23.2774	-26.1043		92.7293	1.03757	1.07655		X Variable 2	-0.383165	0.0254526	-15.0541	2.66047e-18	-0.434567	-0.331762	-0.434567	-0.331762
42	2-bromo-5-nitropyridine	BrC1=CC=C([N+]([O-])=O)C=N1	Br		64.3555	232.404		127.819	98.6601	200.298		68.6521	4.29659	18.4607		X Variable 3	0.058191	0.0067754	8.58858	1.04595e-10	0.0445078	0.0718742	0.0445078	0.0718742
43	2-chloro-6-methyl-pyridine	ClC1=CC=CC(C)=N1	Cl		90.608	121.168		-62.7165	29.5297	-41.1327		88.9423	1.66567	2.77446
44	2-chloro-3-fluoro-5-methyl-pyridine	ClC1=C(F)C=C(C)C=N1	F		79.3836	0.0469706		-38.2417	70.4227	142.547		82.9535	3.56994	12.7445
45	2-bromo-3-(trifluoromethyl)pyridine	BrC1=C(C(F)(F)F)C=CC=N1	Br		76.9183	7.19349		6.48393	74.4146	110.57		77.7203	0.802061	0.643302
46	2-bromo-5-fluoropyridine	BrC1=CC=C(F)C=N1	F		81.2061	2.5784		-25.5739	81.2011	177.914		80.3597	0.846354	0.716315
47	2-chloro-5-bromo-pyridine	ClC1=CC=C(Br)C=N1	Cl		82.2146	6.83434		-17.3677	61.375	63.4058		80.9549	1.25966	1.58674
48	2-bromo-3-cyanopyridine	BrC1=C(C#N)C=CC=N1	Br		73.0073	43.4677		52.4889	88.8284	150.752		72.6401	0.367209	0.134842
49	1-bromo-4-fluorobenzene	BrC1=CC=C(F)C=C1	F		90.3579	115.726		-64.1899	43.9798	70.0038		89.9334	0.424535	0.18023
50	4-(benzyloxy)-2-chloropyridine	ClC1=CC(OCC2=CC=CC=C2)=CC=N1	Cl		90.5979	120.948		-40.815	30.2467	-45.7932		87.4939	3.10403	9.63501
51	1-bromo-4-nitrobenzene	BrC1=CC=C([N+]([O-])=O)C=C1	Br		78.6143	0.972166		101.577	72.6719	212.671		80.4112	1.79682	3.22855
52	2,4-dichloro-pyridine	ClC1=CC(Cl)=CC=N1	Cl		77.3558	5.03783		-23.1569	71.9774	46.5251		76.1487	1.20711	1.45712
53	4-chloro-2-(trifluoromethyl)quinoline	ClC1=CC(C(F)(F)F)=NC2=CC=CC=C21	Cl		69.2354	107.432		69.4706	75.2683	69.5043		72.4082	3.17282	10.0668
54	2-chloro-3-methoxypyridine	ClC1=C(OC)C=CC=N1	Cl		94.3527	217.633		-71.357	25.5504	-28.5542		91.555	2.79769	7.82706
55	4-chloro-N-Methylpyridine-2-carboxamide	ClC1=CC=NC(C(NC)=O)=C1	Cl		80.5058	0.819882		8.10491	68.4744	1.88556		73.6052	6.90063	47.6187
56	2-bromopyridine	BrC1=CC=CC=N1	Br		86.2187	43.8029		-54.0327	35.5302	-11.3949		88.0158	1.79708	3.22949
57	2-chloro-6-(trifluoromethyl)pyridine	ClC1=CC=CC(C(F)(F)F)=N1	Cl		78.9094	0.477398		4.72786	77.8247	100.647		75.9086	3.00076	9.00455
58	2-chloro-3-methyl-pyridine	ClC1=C(C)C=CC=N1	Cl		90.828	126.061		-68.5058	34.386	-28.5343		88.0532	2.7748	7.69953
59	2-chloro-5-cyano-pyridine	ClC1=CC=C(C#N)C=N1	Cl		70.6115	80.7983		46.3138	96.677	163.098		70.6057	0.00587776	3.45481e-05
60	2-chloro-pyridine	ClC1=CC=CC=N1	Cl		88.8	84.634		-60.7868	38.8165	-18.3374		86.6309	2.1691	4.705
61	2-chloro-6-cyano-pyridine	ClC1=CC=CC(C#N)=N1	Cl		73.9494	31.9332		54.5152	91.9131	147.579		71.19	2.75937	7.6141
62	2-chloro-4,6-dimethyl-3-cyano-pyridine	ClC1=C(C#N)C(C)=CC(C)=N1	Cl		71.4942	65.7086		24.6042	74.3952	96.1142		76.1399	4.64569	21.5824
63	2-chloro-5-(trifluoromethyl)pyridine	ClC1=CC=C(C(F)(F)F)C=N1	Cl		74.6968	24.0448		0.578922	80.5433	117.45		76.0157	1.31892	1.73956
64	2-bromo-5-methypyridine	BrC1=CC=C(C)C=N1	Br		90.222	112.82		-56.9273	24.3671	-17.1958		92.0748	1.85279	3.43283
65	2-chloro-3-bromo-pyridine	ClC1=C(Br)C=CC=N1	Cl		81.0918	2.22444		-23.1569	59.8112	45.9246		80.7754	0.316398	0.100108
66	2-chloro-5-fluoropyridine	ClC1=CC=C(F)C=N2	F		82.1608	6.55609		-32.0096	78.9946	175.284		81.3173	0.843499	0.711491			2.38259	RMSE all
67	4-chloro-2-(methylthio)pyrimidine	CSC1=NC=CC(Cl)=N1	Cl		71.6882	62.6015		-16.7801	67.6649	-38.0744		72.6154	0.9272	0.859699			166.619	PRESS test
68	2-chloro-5-nitropyridine	ClC1=CC=C([N+]([O-])=O)C=N1	Cl		64.0292	242.46		123.214	105.299	196.458		66.0747	2.04552	4.18417			5.74548	PRESS-test/n-test
69	2-(benzyloxy)-4-chloropyridine	ClC1=CC(OCC2=CC=CC=C2)=NC=C1	Cl		86.2294	43.9442		-28.22	42.617	-47.4188		82.1405	4.08888	16.7189
70	4,6-dichloro-2-methylpyrimidine	ClC1=NC(C)=NC(Cl)=C1	Cl		67.8169	138.848		-2.25973	86.0815	-0.8368		67.1274	0.689547	0.475476			79.6003	Training mean
71	2-bromo-5-methoxypyridine	BrC1=CC=C(OC)C=N1	Br		94.913	234.478		-53.8996	19.0579	-8.78962		94.4735	0.439498	0.193159			3041.41	TSS-training
72	2-chloro-3-(trifluoromethyl)pyridine	ClC1=C(C(F)(F)F)C=CC=N1	Cl		77.6887	3.65426		-5.01732	77.1838	105.185		76.8199	0.868859	0.754916			67.587	TSS-training/n-training
73	2,3-dichloro-pyridine	ClC1=C(Cl)C=CC=N1	Cl		81.1258	2.32695		-27.9812	60.0677	49.4302		81.0799	0.0458517	0.00210238
74	2-chloro-3-nitropyridine	ClC1=C([N+]([O-])=O)C=CC=N1	Cl		67.7304	140.896		113.855	101.824	176.895		66.6533	1.07705	1.16004			0.914991	Q2
																	0.91882	R2 all
												MAE all	1.89439				0.916664	R2 training
												MAE training	1.92537				0.925979	R2 test
												MAE test	1.84633

## Sheet: Regression Anal. 60-40 4
Order	Name	SMILES	Halide		Measured ΔG‡SNAr (kJ/mol)	SDM		Electron affinity (EA) (kJ/mol)	ESP1 (kJ/mol)	ESP2 (kJ/mol)		Predicted ΔG‡SNAr (kJ/mol)	Absolute Error (60/40 split)	res2
1	2-bromopyridine	BrC1=CC=CC=N1	Br		86.2187	55.1587		-54.0327	35.5302	-11.3949		88.1462	1.92754	3.71541		SUMMARY OUTPUT - ALL DATA REGRESSION
2	1-chloro-4-fluorobenzene	ClC1=CC=C(F)C=C1	F		91.2312	154.738		-82.8978	42.1158	68.8623		91.8578	0.626572	0.392592
3	4-chloro-7-methoxyquinoline	ClC1=CC=NC2=CC(OC)=CC=C21	Cl		82.6293	14.726		13.7976	32.9469	-64.5605		82.3975	0.231714	0.0536915		Regression Statistics
4	1-bromo-4-fluorobenzene	BrC1=CC=C(F)C=C1	F		90.3579	133.775		-64.1899	43.9798	70.0038		90.2288	0.129094	0.0166654		Multiple R	0.959177
5	2-bromo-5-methypyridine	BrC1=CC=C(C)C=N1	Br		90.222	130.649		-56.9273	24.3671	-17.1958		92.0401	1.81809	3.30547		R Square	0.920021
6	2-chloro-4,6-dimethyl-3-cyano-pyridine	ClC1=C(C#N)C(C)=CC(C)=N1	Cl		71.4942	53.2546		24.6042	74.3952	96.1142		75.8143	4.3201	18.6632		Adjusted R Square	0.916593
7	4-chloro-2-(methylthio)pyrimidine	CSC1=NC=CC(Cl)=N1	Cl		71.6882	50.4611		-16.7801	67.6649	-38.0744		72.9124	1.22421	1.49869		Standard Error	2.41629
8	2-chloro-5-cyano-pyridine	ClC1=CC=C(C#N)C=N1	Cl		70.6115	66.9169		46.3138	96.677	163.098		70.3149	0.296595	0.0879687		Observations	74
9	2-bromo-5-fluoropyridine	BrC1=CC=C(F)C=N1	F		81.2061	5.82862		-25.5739	81.2011	177.914		80.689	0.517041	0.267332
10	2-chloro-6-methyl-4 (trifluoromethyl)pyridine	ClC1=CC(C(F)(F)F)=CC(C)=N1	Cl		77.1792	2.60037		-4.72786	66.4097	76.6996		79.2142	2.03497	4.14109		ANOVA
11	4-chloro-2-methylpyrimidine	ClC1=CC=NC(C)=N1	Cl		73.2717	30.4713		-31.8407	68.0204	-60.3884		72.3365	0.935263	0.874717			df	SS	MS	F	Significance F
12	4,6-dichloro-2-methylpyrimidine	ClC1=NC(C)=NC(Cl)=C1	Cl		67.8169	120.448		-2.25973	86.0815	-0.8368		67.5263	0.290597	0.0844467		Regression	3	4701.29	1567.1	268.409	2.60438e-38
13	2-chloro-4-cyano-pyridine	ClC1=CC(C#N)=CC=N1	Cl		73.1654	31.657		69.8566	91.9308	149.603		70.0023	3.16305	10.0049		Residual	70	408.691	5.83845
14	2-chloro-6-isopropoxypyridine	ClC1=CC=CC(OC(C)C)=N1	Cl		89.1561	107.418		-68.5058	25.2033	-38.7837		91.1413	1.98523	3.94114		Total	73	5109.98
15	2-bromo-3-(trifluoromethyl)pyridine	BrC1=C(C(F)(F)F)C=CC=N1	Br		76.9183	3.5102		6.48393	74.4146	110.57		77.6086	0.690364	0.476602
16	2-chloro-3-fluoro-5-methyl-pyridine	ClC1=C(F)C=C(C)C=N1	F		79.3836	0.350212		-38.2417	70.4227	142.547		83.2989	3.91528	15.3295			Coefficients	Standard Error	t Stat	P-value	Lower 95%	Upper 95%	Lower 95.0%	Upper 95.0%
17	2-chloro-6-(trifluoromethyl)pyridine	ClC1=CC=CC(C(F)(F)F)=N1	Cl		78.9094	0.0138238		4.72786	77.8247	100.647		75.9002	3.0092	9.0553		Intercept	99.8026	1.2031	82.9544	1.21841e-71	97.403	102.202	97.403	102.202
18	2-bromo-5-methoxypyridine	BrC1=CC=C(OC)C=N1	Br		94.913	259.893		-53.8996	19.0579	-8.78962		94.2853	0.627709	0.394019		X Variable 1	-0.0465164	0.00815369	5.70495	2.57697e-07	0.0302544	0.0627784	0.0302544	0.0627784
19	4-chloro-6-(pyrrolidin-1-yl)pyrimidine	ClC1=CC(N2CCCC2)=NC=N1	Cl		82.3884	12.9354		-56.9273	22.6528	-161.213		84.5102	2.12183	4.50215		X Variable 2	-0.373305	0.0202007	-18.4798	1.23726e-28	-0.413594	-0.333016	-0.413594	-0.333016
20	2-chloro-6-(tert-butoxy)-pyridine	ClC1=CC=CC(OC(C)(C)C)=N1	Cl		91.6918	166.409		-75.2599	23.2774	-26.1043		92.9269	1.23519	1.52569		X Variable 3	0.0551648	0.00531198	10.385	8.11662e-16	0.0445704	0.0657592	0.0445704	0.0657592
21	4-chloro-2-(trifluoromethyl)quinoline	ClC1=CC(C(F)(F)F)=NC2=CC=CC=C21	Cl		69.2354	91.3251		69.4706	75.2683	69.5043		71.5561	2.32068	5.38557
22	2-chloro-3-bromo-pyridine	ClC1=C(Br)C=CC=N1	Cl		81.0918	5.28987		-23.1569	59.8112	45.9246		80.8744	0.217412	0.0472682
23	2-chloro-5-methyl-pyridine	ClC1=CC=C(C)C=N1	Cl		94.2552	239.116		-63.3572	27.5976	-24.9353		90.7742	3.48099	12.1173		SUMMARY OUTPUT - 60/40 #4
24	2-chloro-5-bromo-pyridine	ClC1=CC=C(Br)C=N1	Cl		82.2146	11.7154		-17.3677	61.375	63.4058		80.9807	1.23392	1.52257
25	2-bromo-3-cyanopyridine	BrC1=C(C#N)C=CC=N1	Br		73.0073	33.4604		52.4889	88.8284	150.752		72.1392	0.868093	0.753586		Regression Statistics
26	2-chloro-3-(trifluoromethyl)pyridine	ClC1=C(C(F)(F)F)C=CC=N1	Cl		77.6887	1.21683		-5.01732	77.1838	105.185		76.9192	0.769556	0.592217		Multiple R	0.964139
27	2-chloro-pyridine	ClC1=CC=CC=N1	Cl		88.8	100.164		-60.7868	38.8165	-18.3374		86.9227	1.87726	3.52412		R Square	0.929564
28	2,6-dichloropyridine	ClC1=CC=CC(Cl)=N1	Cl		77.2025	2.52595		-27.9812	62.5826	49.8303		80.3479	3.14544	9.89379		Adjusted R Square	0.92441
29	2-chloro-4-fluoropyridine	ClC1=CC(F)=CC=N1	F		72.5954	38.3958		-56.8762	84.4231	44.0827		73.6361	1.04074	1.08313		Standard Error	2.44276
30	4-chloro-6-(trifluoromethyl)quinoline	ClC1=CC=NC2=CC=C(C(F)(F)F)C=C21	Cl		69.9828	77.5988		74.295	74.1677	59.3797		71.122	1.13917	1.2977		Observations	45
31	4,6-dichloropyrimidine	ClC1=CC(Cl)=NC=N1	Cl		62.034	280.824		4.61787	99.1485	24.3398		63.8201	1.78612	3.19022
32	2-chloro-5-nitropyridine	ClC1=CC=C([N+]([O-])=O)C=N1	Cl		64.0292	217.935		123.214	105.299	196.458		64.8927	0.863544	0.745708		ANOVA
33	2,4-dichloropyrimidine	ClC1=NC(Cl)=CC=N1	Cl		61.3806	303.15		12.6301	101.171	17.2963		62.2502	0.869616	0.756232			df	SS	MS	F	Significance F
34	4-(6-chloropyrimidin-4-yl)morpholine	ClC1=NC=NC(N2CCOCC2)=C1	Cl		76.897	3.5903		-46.3138	39.2217	-98.4452		81.4545	4.55747	20.7705		Regression	3	3228.74	1076.25	180.363	1.20456e-23
35	2-bromo-5-nitropyridine	BrC1=CC=C([N+]([O-])=O)C=N1	Br		64.3555	208.406		127.819	98.6601	200.298		67.278	2.92245	8.54074		Residual	41	244.651	5.9671
36	4-chloro-2-(trifluoromethyl)pyridine	ClC1=CC=NC(C(F)(F)F)=C1	Cl		74.37	19.5521		3.08758	88.136	96.1254		71.9781	2.39197	5.72152		Total	44	3473.39
37	2-chloro-5-fluoropyridine	ClC1=CC=C(F)C=N2	F		82.1608	11.3502		-32.0096	78.9946	175.284		81.6928	0.468056	0.219076
38	2-(benzyloxy)-4-chloropyridine	ClC1=CC(OCC2=CC=CC=C2)=NC=C1	Cl		86.2294	55.3172		-28.22	42.617	-47.4188		82.1256	4.10375	16.8407			Coefficients	Standard Error	t Stat	P-value	Lower 95%	Upper 95%	Lower 95.0%	Upper 95.0%
39	2-chloro-6-cyano-pyridine	ClC1=CC=CC(C#N)=N1	Cl		73.9494	23.4492		54.5152	91.9131	147.579		70.7263	3.2231	10.3883		Intercept	98.7997	1.57726	62.6401	2.47522e-42	95.6144	101.985	95.6144	101.985
40	2,5-dichloro-pyridine	ClC1=CC=C(Cl)C=N1	Cl		83.0415	18.0597		-22.192	60.398	65.0997		81.694	1.34744	1.8156		X Variable 1	-0.0542421	0.0108781	4.98637	1.17187e-05	0.0322734	0.0762108	0.0322734	0.0762108
41	4-chloro-N-Methylpyridine-2-carboxamide	ClC1=CC=NC(C(NC)=O)=C1	Cl		80.5058	2.93775		8.10491	68.4744	1.88556		73.5303	6.97548	48.6574		X Variable 2	-0.364173	0.0252084	-14.4465	1.10881e-17	-0.415082	-0.313263	-0.415082	-0.313263
42	3,4,5-trichloro-pyridine	ClC1=CN=CC(Cl)=C1Cl	Cl		72.1837	43.6672		-2.89461	90.1805	108.8		72.2756	0.0919195	0.0084492		X Variable 3	0.0566195	0.00650064	8.70984	7.18191e-11	0.0434912	0.0697478	0.0434912	0.0697478
43	4-(benzyloxy)-2-chloropyridine	ClC1=CC(OCC2=CC=CC=C2)=CC=N1	Cl		90.5979	139.385		-40.815	30.2467	-45.7932		87.4058	3.19218	10.19
44	2-chloro-6-methyl-pyridine	ClC1=CC=CC(C)=N1	Cl		90.608	139.622		-62.7165	29.5297	-41.1327		89.1187	1.48923	2.21779
45	3,4-dichloro-pyridine	ClC1=CN=CC=C1Cl	Cl		76.7622	4.11942		-28.9461	71.4814	46.3825		76.9644	0.202192	0.0408817
46	2-chloro-5-(trifluoromethyl)pyridine	ClC1=CC=C(C(F)(F)F)C=N1	Cl		74.6968	16.7693		0.578922	80.5433	117.45		76.0866	1.3898	1.93154
47	4-chloro-quinoline	ClC1=CC=NC2=CC=CC=C21	Cl		79.8819	1.18821		27.3058	44.2789	-33.895		79.2743	0.607582	0.369156
48	2-chloro-4-(trifluoromethyl)pyridine	ClC1=CC(C(F)(F)F)=CC=N1	Cl		75.7475	9.26799		14.9555	76.3185	102.229		75.9835	0.236026	0.0557082
49	2-chloro-3-fluoropyridine	ClC1=C(F)C=CC=N1	F		79.3991	0.368774		-40.2428	79.8346	166.128		81.3151	1.916	3.67105
50	2-chloro-3-methyl-pyridine	ClC1=C(C)C=CC=N1	Cl		90.828	144.87		-68.5058	34.386	-28.5343		88.3775	2.45045	6.0047
51	2-chloro-6-methoxypyridine	ClC1=CC=CC(OC)=N1	Cl		88.5591	95.3991		-73.0418	29.0914	-30.5432		90.438	1.87893	3.53037
52	4-bromo-2-cyanopyridine	BrC1=CC=NC(C#N)=C1	Br		70.8426	63.1894		54.4187	98.1366	141.966		68.1473	2.69534	7.26486
53	2,5-dibromo-pyridine	BrC1=CC=C(Br)C=N1	Br		81.9831	10.1846		-11.3565	57.0993	68.6556		82.5089	0.525766	0.27643
54	4-bromo-2-chloro-pyridine	ClC1=CC(Br)=CC=N1	Br		76.9948	3.22915		-16.4028	68.4263	48.2352		77.5015	0.506639	0.256683
55	2,4-dichloro-pyridine	ClC1=CC(Cl)=CC=N1	Cl		77.3558	2.06209		-23.1569	71.9774	46.5251		76.4778	0.878012	0.770905
56	4-chloro-6,7-dimethoxyquinoline	ClC1=CC=NC2=CC(OC)=C(OC)C=C21	Cl		87.58	77.2318		3.66651	21.6297	-97.3361		85.2127	2.36724	5.60384
57	1-bromo-4-nitrobenzene	BrC1=CC=C([N+]([O-])=O)C=C1	Br		78.6143	0.0314958		101.577	72.6719	212.671		78.8661	0.251807	0.0634065
58	4-chloro-2-methyl-pyridine	CC1=CC(Cl)=CC=N1	Cl		87.7737	80.6736		-58.8571	39.3211	-45.5314		85.0946	2.67909	7.17754
59	2-chloro-3-cyano-pyridine	ClC1=C(C#N)C=CC=N1	Cl		72.4308	40.4627		49.0154	95.859	150.244		69.7385	2.69231	7.24851
60	4-chloro-pyridine-2-carboxamide	ClC1=CC=NC(C(N)=O)=C1	Cl		79.7811	0.978627		-5.69273	70.8151	25.1874		74.7456	5.03543	25.3556
61	2-chloro-3-nitropyridine	ClC1=C([N+]([O-])=O)C=CC=N1	Cl		67.7304	122.355		113.855	101.824	176.895		65.5581	2.17226	4.7187
62	2-bromo-5-cyanopyridine	BrC1=CC=C(C#N)C=N1	Br		72.2835	42.3584		52.7813	90.676	166.995		72.3702	0.0866906	0.00751527
63	2-chloro-3-methoxypyridine	ClC1=C(OC)C=CC=N1	Cl		94.3527	242.141		-71.357	25.5504	-28.5542		91.7488	2.60393	6.78048
64	2-chloro-5-methoxypyridine	ClC1=CC=C(OC)C=N1	Cl		95.6149	283.017		-58.2781	24.2168	-15.5421		92.2617	3.35316	11.2437
65	2,3-dichloro-pyridine	ClC1=C(Cl)C=CC=N1	Cl		81.1258	5.44732		-27.9812	60.0677	49.4302		81.2412	0.115392	0.0133154
66	2-bromo-3-methoxypyridine	BrC1=C(OC)C=CC=N1	Br		92.4118	185.505		-50.0748	34.3974	-2.05861		88.8727	3.53913	12.5254			2.38208	RMSE all
67	2-chloro-6-bromo-pyridine	BrC1=CC=CC(Cl)=N1	Cl		76.6031	4.79028		-21.2271	64.0013	54.8608		79.7498	3.14663	9.90126			175.248	PRESS test
68	4-chloro-3-bromo-pyridine	BrC1=CN=CC=C1Cl	Cl		76.6235	4.70151		-25.0866	70.9904	42.0862		76.6906	0.0670594	0.00449696			6.04303	PRESS-test/n-test
69	2-chloro-4-methyl-pyridine	ClC1=CC(C)=CC=N1	Cl		91.256	155.356		-67.5409	28.9759	-42.5973		89.4992	1.75679	3.08631
70	2-chloro-5-(1,3-dioxolan-2-yl)pyridine	ClC1=CC=C(C2OCCO2)C=N1	Cl		84.7752	35.8011		-45.3489	29.8655	-32.6442		88.535	3.75979	14.136			78.7918	Training mean
71	1-bromo-3,5-difluorobenzene	BrC1=CC(F)=CC(F)=C1	F		80.8536	4.25108		-60.9624	63.9978	119.662		85.5754	4.72174	22.2948			3473.39	TSS-training
72	2-bromo-5-(trifluoromethyl)pyridine	BrC1=CC=C(C(F)(F)F)C=N1	Br		76.9722	3.31087		55.1137	74.3893	123.515		75.713	1.25925	1.58572			77.1864	TSS-training/n-training
73	2-chloro-6-fluoropyridine	ClC1=CC=CC(F)=N1	F		74.9861	14.4835		-39.7112	80.2464	44.1187		74.2281	0.757962	0.574506
74	1-bromo-3,5-bis(trifluoromethyl)benzene	BrC1=CC(C(F)(F)F)=CC(C(F)(F)F)=C1	Br		85.9779	51.6393		17.1592	81.7621	239.3		81.6425	4.33538	18.7955			0.921709	Q2
																	0.918962	R2 all
												MAE all	1.88464				0.929564	R2 training
												MAE training	1.81505				0.896141	R2 test
												MAE test	1.99261

## Sheet: Regression Anal. 60-40 5
Order	Name	SMILES	Halide		Measured ΔG‡SNAr (kJ/mol)	SDM		Electron affinity (EA) (kJ/mol)	ESP1 (kJ/mol)	ESP2 (kJ/mol)		Predicted ΔG‡SNAr (kJ/mol)	Absolute Error (60/40 split)	res2
1	4-chloro-6-(trifluoromethyl)quinoline	ClC1=CC=NC2=CC=C(C(F)(F)F)C=C21	Cl		69.9828	92.9557		74.295	74.1677	59.3797		71.6805	1.69767	2.88209		SUMMARY OUTPUT - ALL DATA REGRESSION
2	4-chloro-N-Methylpyridine-2-carboxamide	ClC1=CC=NC(C(NC)=O)=C1	Cl		80.5058	0.77731		8.10491	68.4744	1.88556		73.975	6.53079	42.6512
3	4-bromo-2-cyanopyridine	BrC1=CC=NC(C#N)=C1	Br		70.8426	77.115		54.4187	98.1366	141.966		68.7938	2.04881	4.19763		Regression Statistics
4	2,5-dibromo-pyridine	BrC1=CC=C(Br)C=N1	Br		81.9831	5.56489		-11.3565	57.0993	68.6556		83.1325	1.14933	1.32096		Multiple R	0.959177
5	2-chloro-3-(trifluoromethyl)pyridine	ClC1=C(C(F)(F)F)C=CC=N1	Cl		77.6887	3.74591		-5.01732	77.1838	105.185		77.5509	0.137833	0.0189979		R Square	0.920021
6	4-chloro-6-(pyrrolidin-1-yl)pyrimidine	ClC1=CC(N2CCCC2)=NC=N1	Cl		82.3884	7.64107		-56.9273	22.6528	-161.213		84.7577	2.36934	5.61377		Adjusted R Square	0.916593
7	2-bromo-5-(trifluoromethyl)pyridine	BrC1=CC=C(C(F)(F)F)C=N1	Br		76.9722	7.03266		55.1137	74.3893	123.515		76.404	0.568272	0.322933		Standard Error	2.41629
8	2-chloro-5-bromo-pyridine	ClC1=CC=C(Br)C=N1	Cl		82.2146	6.71035		-17.3677	61.375	63.4058		81.577	0.637631	0.406573		Observations	74
9	2-bromo-5-nitropyridine	BrC1=CC=C([N+]([O-])=O)C=N1	Br		64.3555	233.131		127.819	98.6601	200.298		68.0596	3.70403	13.7198
10	4-(6-chloropyrimidin-4-yl)morpholine	ClC1=NC=NC(N2CCOCC2)=C1	Cl		76.897	7.43732		-46.3138	39.2217	-98.4452		81.7791	4.88213	23.8352		ANOVA
11	4-chloro-quinoline	ClC1=CC=NC2=CC=CC=C21	Cl		79.8819	0.0664171		27.3058	44.2789	-33.895		79.7313	0.150564	0.0226694			df	SS	MS	F	Significance F
12	2,6-dichloropyridine	ClC1=CC=CC(Cl)=N1	Cl		77.2025	5.86444		-27.9812	62.5826	49.8303		80.9092	3.70674	13.7399		Regression	3	4701.29	1567.1	268.409	2.60438e-38
13	4-chloro-6,7-dimethoxyquinoline	ClC1=CC=NC2=CC(OC)=C(OC)C=C21	Cl		87.58	63.2952		3.66651	21.6297	-97.3361		85.6103	1.96964	3.87949		Residual	70	408.691	5.83845
14	2-(benzyloxy)-4-chloropyridine	ClC1=CC(OCC2=CC=CC=C2)=NC=C1	Cl		86.2294	43.6289		-28.22	42.617	-47.4188		82.5501	3.67926	13.537		Total	73	5109.98
15	4-chloro-2-(trifluoromethyl)quinoline	ClC1=CC(C(F)(F)F)=NC2=CC=CC=C21	Cl		69.2354	107.926		69.4706	75.2683	69.5043		72.1314	2.89604	8.38704
16	2,4-dichloro-pyridine	ClC1=CC(Cl)=CC=N1	Cl		77.3558	5.14534		-23.1569	71.9774	46.5251		76.9998	0.355999	0.126735			Coefficients	Standard Error	t Stat	P-value	Lower 95%	Upper 95%	Lower 95.0%	Upper 95.0%
17	2-chloro-6-methyl-pyridine	ClC1=CC=CC(C)=N1	Cl		90.608	120.644		-62.7165	29.5297	-41.1327		89.5967	1.01123	1.02259		Intercept	99.8026	1.2031	82.9544	1.21841e-71	97.403	102.202	97.403	102.202
18	4-chloro-3-bromo-pyridine	BrC1=CN=CC=C1Cl	Cl		76.6235	9.0038		-25.0866	70.9904	42.0862		77.2063	0.582762	0.339611		X Variable 1	-0.0465164	0.00815369	5.70495	2.57697e-07	0.0302544	0.0627784	0.0302544	0.0627784
19	2-chloro-6-methoxypyridine	ClC1=CC=CC(OC)=N1	Cl		88.5591	79.8326		-73.0418	29.0914	-30.5432		90.9383	2.37923	5.66075		X Variable 2	-0.373305	0.0202007	-18.4798	1.23726e-28	-0.413594	-0.333016	-0.413594	-0.333016
20	2-chloro-5-cyano-pyridine	ClC1=CC=C(C#N)C=N1	Cl		70.6115	81.2271		46.3138	96.677	163.098		71.0102	0.398671	0.158939		X Variable 3	0.0551648	0.00531198	10.385	8.11662e-16	0.0445704	0.0657592	0.0445704	0.0657592
21	3,4-dichloro-pyridine	ClC1=CN=CC=C1Cl	Cl		76.7622	8.19088		-28.9461	71.4814	46.3825		77.4868	0.724648	0.525114
22	2-chloro-3-methoxypyridine	ClC1=C(OC)C=CC=N1	Cl		94.3527	216.93		-71.357	25.5504	-28.5542		92.2661	2.08664	4.35405
23	2-chloro-6-cyano-pyridine	ClC1=CC=CC(C#N)=N1	Cl		73.9494	32.203		54.5152	91.9131	147.579		71.4067	2.54268	6.46524		SUMMARY OUTPUT - 60/40 #5
24	4,6-dichloro-2-methylpyrimidine	ClC1=NC(C)=NC(Cl)=C1	Cl		67.8169	139.41		-2.25973	86.0815	-0.8368		67.9014	0.0845065	0.00714134
25	2-chloro-3-methyl-pyridine	ClC1=C(C)C=CC=N1	Cl		90.828	125.526		-68.5058	34.386	-28.5343		88.8643	1.96373	3.85622		Regression Statistics
26	2-chloro-3-bromo-pyridine	ClC1=C(Br)C=CC=N1	Cl		81.0918	2.15395		-23.1569	59.8112	45.9246		81.4379	0.346163	0.119829		Multiple R	0.952887
27	2-chloro-6-(trifluoromethyl)pyridine	ClC1=CC=CC(C(F)(F)F)=N1	Cl		78.9094	0.510884		4.72786	77.8247	100.647		76.5217	2.38772	5.70119		R Square	0.907993
28	2-chloro-5-methoxypyridine	ClC1=CC=C(OC)C=N1	Cl		95.6149	255.704		-58.2781	24.2168	-15.5421		92.8137	2.8012	7.84671		Adjusted R Square	0.901261
29	2-chloro-5-fluoropyridine	ClC1=CC=C(F)C=N2	F		82.1608	6.43467		-32.0096	78.9946	175.284		82.4627	0.301897	0.0911418		Standard Error	2.46209
30	2-chloro-6-bromo-pyridine	BrC1=CC=CC(Cl)=N1	Cl		76.6031	9.12649		-21.2271	64.0013	54.8608		80.3179	3.71481	13.7998		Observations	45
31	2-chloro-pyridine	ClC1=CC=CC=N1	Cl		88.8	84.1963		-60.7868	38.8165	-18.3374		87.4169	1.3831	1.91296
32	1-bromo-3,5-bis(trifluoromethyl)benzene	BrC1=CC(C(F)(F)F)=CC(C(F)(F)F)=C1	Br		85.9779	40.3696		17.1592	81.7621	239.3		82.5475	3.43036	11.7674		ANOVA
33	2-bromo-5-methypyridine	BrC1=CC=C(C)C=N1	Br		90.222	112.315		-56.9273	24.3671	-17.1958		92.5882	2.36624	5.59909			df	SS	MS	F	Significance F
34	2-chloro-5-(trifluoromethyl)pyridine	ClC1=CC=C(C(F)(F)F)C=N1	Cl		74.6968	24.279		0.578922	80.5433	117.45		76.7335	2.03677	4.14845		Regression	3	2452.74	817.581	134.872	2.84811e-21
35	2-bromo-3-cyanopyridine	BrC1=C(C#N)C=CC=N1	Br		73.0073	43.7824		52.4889	88.8284	150.752		72.8369	0.170411	0.0290401		Residual	41	248.537	6.06188
36	1-bromo-4-fluorobenzene	BrC1=CC=C(F)C=C1	F		90.3579	115.214		-64.1899	43.9798	70.0038		90.8923	0.534416	0.2856		Total	44	2701.28
37	2-chloro-3-cyano-pyridine	ClC1=C(C#N)C=CC=N1	Cl		72.4308	51.7445		49.0154	95.859	150.244		70.4097	2.02106	4.0847
38	4-chloro-7-methoxyquinoline	ClC1=CC=NC2=CC(OC)=CC=C21	Cl		82.6293	9.03068		13.7976	32.9469	-64.5605		82.8268	0.197576	0.0390361			Coefficients	Standard Error	t Stat	P-value	Lower 95%	Upper 95%	Lower 95.0%	Upper 95.0%
39	2-bromo-5-fluoropyridine	BrC1=CC=C(F)C=N1	F		81.2061	2.50246		-25.5739	81.2011	177.914		81.4579	0.251853	0.0634302		Intercept	99.4801	1.99839	49.7802	2.70994e-38	95.4443	103.516	95.4443	103.516
40	2-chloro-4-cyano-pyridine	ClC1=CC(C#N)=CC=N1	Cl		73.1654	41.716		69.8566	91.9308	149.603		70.6896	2.47574	6.1293		X Variable 1	-0.0540694	0.0110442	4.89573	1.56766e-05	0.0317652	0.0763736	0.0317652	0.0763736
41	4-chloro-2-(trifluoromethyl)pyridine	ClC1=CC=NC(C(F)(F)F)=C1	Cl		74.37	27.6057		3.08758	88.136	96.1254		72.5533	1.81671	3.30042		X Variable 2	-0.367694	0.0360302	-10.2052	8.05744e-13	-0.440459	-0.29493	-0.440459	-0.29493
42	2-chloro-4-(trifluoromethyl)pyridine	ClC1=CC(C(F)(F)F)=CC=N1	Cl		75.7475	15.0286		14.9555	76.3185	102.229		76.6154	0.86795	0.753338		X Variable 3	0.0587489	0.00818492	7.1777	9.26014e-09	0.0422191	0.0752787	0.0422191	0.0752787
43	2-chloro-3-fluoro-5-methyl-pyridine	ClC1=C(F)C=C(C)C=N1	F		79.3836	0.0578638		-38.2417	70.4227	142.547		84.0282	4.64463	21.5726
44	2-chloro-5-nitropyridine	ClC1=CC=C([N+]([O-])=O)C=N1	Cl		64.0292	243.202		123.214	105.299	196.458		65.642	1.61277	2.60102
45	2-chloro-4-methyl-pyridine	ClC1=CC(C)=CC=N1	Cl		91.256	135.3		-67.5409	28.9759	-42.5973		89.9752	1.2808	1.64044
46	2-chloro-5-methyl-pyridine	ClC1=CC=C(C)C=N1	Cl		94.2552	214.068		-63.3572	27.5976	-24.9353		91.2934	2.96181	8.77233
47	4-(benzyloxy)-2-chloropyridine	ClC1=CC(OCC2=CC=CC=C2)=CC=N1	Cl		90.5979	120.424		-40.815	30.2467	-45.7932		87.8751	2.72286	7.41394
48	2-bromopyridine	BrC1=CC=CC=N1	Br		86.2187	43.4881		-54.0327	35.5302	-11.3949		88.6679	2.44923	5.99871
49	4-chloro-pyridine-2-carboxamide	ClC1=CC=NC(C(N)=O)=C1	Cl		79.7811	0.0246237		-5.69273	70.8151	25.1874		75.2293	4.55175	20.7184
50	2-chloro-4,6-dimethyl-3-cyano-pyridine	ClC1=C(C#N)C(C)=CC(C)=N1	Cl		71.4942	66.0954		24.6042	74.3952	96.1142		76.4417	4.94744	24.4772
51	2-chloro-4-fluoropyridine	ClC1=CC(F)=CC=N1	F		72.5954	49.4036		-56.8762	84.4231	44.0827		74.1033	1.5079	2.27376
52	2-chloro-6-isopropoxypyridine	ClC1=CC=CC(OC(C)C)=N1	Cl		89.1561	90.8578		-68.5058	25.2033	-38.7837		91.6385	2.48246	6.16262
53	4-chloro-2-(methylthio)pyrimidine	CSC1=NC=CC(Cl)=N1	Cl		71.6882	62.9791		-16.7801	67.6649	-38.0744		73.2706	1.58236	2.50387
54	2-chloro-3-nitropyridine	ClC1=C([N+]([O-])=O)C=CC=N1	Cl		67.7304	141.462		113.855	101.824	176.895		66.2763	1.45407	2.11432
55	1-bromo-3,5-difluorobenzene	BrC1=CC(F)=CC(F)=C1	F		80.8536	1.51162		-60.9624	63.9978	119.662		86.2747	5.42106	29.3879
56	3,4,5-trichloro-pyridine	ClC1=CN=CC(Cl)=C1Cl	Cl		72.1837	55.3604		-2.89461	90.1805	108.8		72.8696	0.68594	0.470514
57	4,6-dichloropyrimidine	ClC1=CC(Cl)=NC=N1	Cl		62.034	309.413		4.61787	99.1485	24.3398		64.204	2.17001	4.70893
58	4-chloro-2-methyl-pyridine	CC1=CC(Cl)=CC=N1	Cl		87.7737	66.4145		-58.8571	39.3211	-45.5314		85.5294	2.24428	5.03678
59	2-chloro-6-methyl-4 (trifluoromethyl)pyridine	ClC1=CC(C(F)(F)F)=CC(C)=N1	Cl		77.1792	5.97755		-4.72786	66.4097	76.6996		79.8233	2.64402	6.99085
60	2,3-dichloro-pyridine	ClC1=C(Cl)C=CC=N1	Cl		81.1258	2.25484		-27.9812	60.0677	49.4302		81.8105	0.684696	0.468809
61	2,5-dichloro-pyridine	ClC1=CC=C(Cl)C=N1	Cl		83.0415	11.6782		-22.192	60.398	65.0997		82.2965	0.744936	0.55493
62	2,4-dichloropyrimidine	ClC1=NC(Cl)=CC=N1	Cl		61.3806	332.827		12.6301	101.171	17.2963		62.6134	1.23277	1.51972
63	2-chloro-3-fluoropyridine	ClC1=C(F)C=CC=N1	F		79.3991	0.0506557		-40.2428	79.8346	166.128		82.0612	2.66208	7.08665
64	2-chloro-5-(1,3-dioxolan-2-yl)pyridine	ClC1=CC=C(C2OCCO2)C=N1	Cl		84.7752	26.5335		-45.3489	29.8655	-32.6442		89.0329	4.25768	18.1278
65	2-bromo-3-methoxypyridine	BrC1=C(OC)C=CC=N1	Br		92.4118	163.525		-50.0748	34.3974	-2.05861		89.4189	2.99288	8.95736
66	1-bromo-4-nitrobenzene	BrC1=CC=C([N+]([O-])=O)C=C1	Br		78.6143	1.01971		101.577	72.6719	212.671		79.761	1.14671	1.31494			2.38921	RMSE all
67	2-chloro-6-(tert-butoxy)-pyridine	ClC1=CC=CC(OC(C)(C)C)=N1	Cl		91.6918	145.627		-75.2599	23.2774	-26.1043		93.4568	1.76503	3.11535			173.878	PRESS test
68	2-chloro-6-fluoropyridine	ClC1=CC=CC(F)=N1	F		74.9861	21.5115		-39.7112	80.2464	44.1187		74.713	0.273051	0.0745569			5.99578	PRESS-test/n-test
69	1-chloro-4-fluorobenzene	ClC1=CC=C(F)C=C1	F		91.2312	134.724		-82.8978	42.1158	68.8623		92.5222	1.29098	1.66664
70	4-chloro-2-methylpyrimidine	ClC1=CC=NC(C)=N1	Cl		73.2717	40.3532		-31.8407	68.0204	-60.3884		72.6432	0.628478	0.394985			79.6241	Training mean
71	2-bromo-3-(trifluoromethyl)pyridine	BrC1=C(C(F)(F)F)C=CC=N1	Br		76.9183	7.32184		6.48393	74.4146	110.57		78.2635	1.34529	1.80981			2701.28	TSS-training
72	2-bromo-5-methoxypyridine	BrC1=CC=C(OC)C=N1	Br		94.913	233.749		-53.8996	19.0579	-8.78962		94.8705	0.0424456	0.00180163			60.0284	TSS-training/n-training
73	2-bromo-5-cyanopyridine	BrC1=CC=C(C#N)C=N1	Br		72.2835	53.8855		52.7813	90.676	166.995		73.096	0.812504	0.660163
74	4-bromo-2-chloro-pyridine	ClC1=CC(Br)=CC=N1	Br		76.9948	6.91332		-16.4028	68.4263	48.2352		78.0408	1.04596	1.09404			0.900118	Q2
																	0.918564	R2 all
												MAE all	1.9142				0.907993	R2 training
												MAE training	1.84223				0.93441	R2 test
												MAE test	2.02589

## Sheet: SNAr All_LUMO by DFT
Entry	Name	SMILES	Halide		Measured ΔG‡SNAr (kJ/mol)		Electron affinity (EA) (kJ/mol)	LUMO by DFT (kJ/mol)	ESP1 (kJ/mol)	ESP2 (kJ/mol)		Norm. LUMO	Norm. ESP1	Norm. ESP2		Predicted ΔG‡SNAr (all data) (kJ/mol)	Absolute Error (all data)	Residuals (all data)		MLR Coefficients
1	2-bromo-5-nitropyridine	BrC1=CC=C([N+]([O-])=O)C=N1	Br		64.3555		127.819	-311.817	98.6601	200.298		0	0.923024	0.90262		67.7578	3.40223	-3.40223		LUMO	ESP1	ESP2	Intercept						SUMMARY OUTPUT
2	4-bromo-2-cyanopyridine	BrC1=CC=NC(C#N)=C1	Br		70.8426		54.4187	-230.476	98.1366	141.966		0.3752	0.916953	0.756976		68.6967	2.14598	2.14598		0.0503522	-0.365918	0.0574018	108.062	all data
3	2-bromo-5-cyanopyridine	BrC1=CC=C(C#N)C=N1	Br		72.2835		52.7813	-226.095	90.676	166.995		0.395407	0.830445	0.819468		73.0839	0.800415	-0.800415		10.9161	-31.5571	22.9902	76.1343	all data (norm.)					Regression Statistics
4	2-bromo-3-cyanopyridine	BrC1=C(C#N)C=CC=N1	Br		73.0073		52.4889	-229.965	88.8284	150.752		0.377559	0.80902	0.778913		72.6328	0.374534	0.374534		0.166751	0.482057	0.351192		% contribution					Multiple R	0.957623
5	2-bromo-3-(trifluoromethyl)pyridine	BrC1=C(C(F)(F)F)C=CC=N1	Br		76.9183		6.48393	-187.702	74.4146	110.57		0.572503	0.641886	0.678585		77.7285	0.810257	-0.810257											R Square	0.917043
6	2-bromo-5-(trifluoromethyl)pyridine	BrC1=CC=C(C(F)(F)F)C=N1	Br		76.9722		55.1137	-179.143	74.3893	123.515		0.611981	0.641593	0.710907		78.9118	1.93954	-1.93954		65.4633									Adjusted R Square	0.913487
7	4-bromo-2-chloro-pyridine	ClC1=CC(Br)=CC=N1	Br		76.9948		-16.4028	-157.79	68.4263	48.2352		0.710477	0.572449	0.522949		77.8478	0.852927	-0.852927											Standard Error	2.46086
8	1-bromo-4-nitrobenzene	BrC1=CC=C([N+]([O-])=O)C=C1	Br		78.6143		101.577	-283.941	72.6719	212.671		0.128583	0.621679	0.933511		79.3811	0.766793	-0.766793											Observations	74
9	2,5-dibromo-pyridine	BrC1=CC=C(Br)C=N1	Br		81.9831		-11.3565	-164.651	57.0993	68.6556		0.678832	0.441108	0.573934		82.8192	0.836082	-0.836082
10	1-bromo-3,5-bis(trifluoromethyl)benzene	BrC1=CC(C(F)(F)F)=CC(C(F)(F)F)=C1	Br		85.9779		17.1592	-189.082	81.7621	239.3		0.566139	0.727084	1		82.3598	3.61803	3.61803											ANOVA
11	2-bromopyridine	BrC1=CC=CC=N1	Br		86.2187		-54.0327	-132.211	35.5302	-11.3949		0.828467	0.191004	0.374064		87.7502	1.53146	-1.53146												df	SS	MS	F	Significance F
12	2-bromo-5-methypyridine	BrC1=CC=C(C)C=N1	Br		90.222		-56.9273	-122.735	24.3671	-17.1958		0.872174	0.0615626	0.359581		91.9791	1.75705	-1.75705											Regression	3	4686.07	1562.02	257.936	9.34866e-38
13	2-bromo-3-methoxypyridine	BrC1=C(OC)C=CC=N1	Br		92.4118		-50.0748	-111.803	34.3974	-2.05861		0.922601	0.177869	0.397375		89.7281	2.68367	2.68367											Residual	70	423.91	6.05586
14	2-bromo-5-methoxypyridine	BrC1=CC=C(OC)C=N1	Br		94.913		-53.8996	-125.012	19.0579	-8.78962		0.86167	0	0.380569		94.2897	0.623335	0.623335											Total	73	5109.98
15	2,4-dichloropyrimidine	ClC1=NC(Cl)=CC=N1	Cl		61.3806		12.6301	-198.441	101.171	17.2963		0.522966	0.952138	0.445701		62.0431	0.662469	-0.662469
16	4,6-dichloropyrimidine	ClC1=CC(Cl)=NC=N1	Cl		62.034		4.61787	-188.291	99.1485	24.3398		0.569788	0.928687	0.463287		63.6985	1.66452	-1.66452												Coefficients	Standard Error	t Stat	P-value	Lower 95%	Upper 95%	Lower 95.0%	Upper 95.0%
17	2-chloro-5-nitropyridine	ClC1=CC=C([N+]([O-])=O)C=N1	Cl		64.0292		123.214	-310.312	105.299	196.458		0.00694321	1	0.89303		65.1839	1.15472	-1.15472											Intercept	108.062	1.25529	86.0858	9.33598e-73	105.559	110.566	105.559	110.566
18	2-chloro-3-nitropyridine	ClC1=C([N+]([O-])=O)C=CC=N1	Cl		67.7304		113.855	-301.425	101.824	176.895		0.0479348	0.959711	0.844185		65.7799	1.95052	1.95052											X Variable 1	0.0503522	0.00937201	5.37262	9.6276e-07	0.0316604	0.0690441	0.0316604	0.0690441
19	4,6-dichloro-2-methylpyrimidine	ClC1=NC(C)=NC(Cl)=C1	Cl		67.8169		-2.25973	-174.213	86.0815	-0.8368		0.634725	0.777169	0.400426		67.7437	0.0732821	0.0732821											X Variable 2	-0.365918	0.0214598	-17.0513	1.25761e-26	-0.408719	-0.323118	-0.408719	-0.323118
20	4-chloro-2-(trifluoromethyl)quinoline	ClC1=CC(C(F)(F)F)=NC2=CC=CC=C21	Cl		69.2354		69.4706	-229.077	75.2683	69.5043		0.381654	0.651785	0.576053		72.9756	3.74017	-3.74017											X Variable 3	0.0574018	0.0055041	10.4289	6.77154e-16	0.0464243	0.0683794	0.0464243	0.0683794
21	4-chloro-6-(trifluoromethyl)quinoline	ClC1=CC=NC2=CC=C(C(F)(F)F)C=C21	Cl		69.9828		74.295	-234.538	74.1677	59.3797		0.356463	0.639023	0.550774		72.5221	2.53935	-2.53935
22	2-chloro-5-cyano-pyridine	ClC1=CC=C(C#N)C=N1	Cl		70.6115		46.3138	-223.944	96.677	163.098		0.405332	0.900028	0.809738		70.7727	0.161138	-0.161138												SUMMARY OUTPUT - NORMALIZED DESCRIPTORS
23	2-chloro-4,6-dimethyl-3-cyano-pyridine	ClC1=C(C#N)C(C)=CC(C)=N1	Cl		71.4942		24.6042	-191.031	74.3952	96.1142		0.557148	0.641661	0.642493		76.7382	5.24398	-5.24398
24	4-chloro-2-(methylthio)pyrimidine	CSC1=NC=CC(Cl)=N1	Cl		71.6882		-16.7801	-159.681	67.6649	-38.0744		0.701754	0.56362	0.307451		73.0768	1.38861	-1.38861												Regression Statistics
25	3,4,5-trichloro-pyridine	ClC1=CN=CC(Cl)=C1Cl	Cl		72.1837		-2.89461	-172.881	90.1805	108.8		0.640867	0.824699	0.674167		72.6042	0.42046	-0.42046												Multiple R	0.957623
26	2-chloro-3-cyano-pyridine	ClC1=C(C#N)C=CC=N1	Cl		72.4308		49.0154	-229.559	95.859	150.244		0.379429	0.890543	0.777643		70.0514	2.37942	2.37942												R Square	0.917043
27	2-chloro-4-cyano-pyridine	ClC1=CC(C#N)=CC=N1	Cl		73.1654		69.8566	-251.443	91.9308	149.603		0.278485	0.844994	0.776044		70.3501	2.81525	2.81525												Adjusted R Square	0.913487
28	4-chloro-2-methylpyrimidine	ClC1=CC=NC(C)=N1	Cl		73.2717		-31.8407	-154.336	68.0204	-60.3884		0.726411	0.567742	0.251738		71.935	1.3367	1.3367												Standard Error	2.46086
29	2-chloro-6-cyano-pyridine	ClC1=CC=CC(C#N)=N1	Cl		73.9494		54.5152	-235.059	91.9131	147.579		0.354059	0.844789	0.77099		71.0653	2.88402	2.88402												Observations	74
30	4-chloro-2-(trifluoromethyl)pyridine	ClC1=CC=NC(C(F)(F)F)=C1	Cl		74.37		3.08758	-184.884	88.136	96.1254		0.585499	0.800991	0.642521		72.0204	2.34969	2.34969
31	2-chloro-5-(trifluoromethyl)pyridine	ClC1=CC=C(C(F)(F)F)C=N1	Cl		74.6968		0.578922	-184.499	80.5433	117.45		0.58728	0.712951	0.695764		76.0421	1.34538	-1.34538												ANOVA
32	2-chloro-4-(trifluoromethyl)pyridine	ClC1=CC(C(F)(F)F)=CC=N1	Cl		75.7475		14.9555	-199.889	76.3185	102.229		0.51629	0.663963	0.65776		75.9394	0.191958	-0.191958													df	SS	MS	F	Significance F
33	2-chloro-6-bromo-pyridine	BrC1=CC=CC(Cl)=N1	Cl		76.6031		-21.2271	-156.787	64.0013	54.8608		0.715106	0.521139	0.539491		79.8978	3.29467	-3.29467												Regression	3	4686.07	1562.02	257.936	9.34866e-38
34	4-chloro-3-bromo-pyridine	BrC1=CN=CC=C1Cl	Cl		76.6235		-25.0866	-152.435	70.9904	42.0862		0.735179	0.602181	0.507596		76.8262	0.202678	-0.202678												Residual	70	423.91	6.05586
35	3,4-dichloro-pyridine	ClC1=CN=CC=C1Cl	Cl		76.7622		-28.9461	-151.518	71.4814	46.3825		0.739407	0.607874	0.518323		76.9393	0.177124	-0.177124												Total	73	5109.98
36	4-(6-chloropyrimidin-4-yl)morpholine	ClC1=NC=NC(N2CCOCC2)=C1	Cl		76.897		-46.3138	-115.47	39.2217	-98.4452		0.905688	0.233808	0.156718		82.2455	5.34848	-5.34848
37	2-chloro-6-methyl-4 (trifluoromethyl)pyridine	ClC1=CC(C(F)(F)F)=CC(C)=N1	Cl		77.1792		-4.72786	-187.712	66.4097	76.6996		0.572459	0.549066	0.594019		78.7129	1.5337	-1.5337													Coefficients	Standard Error	t Stat	P-value	Lower 95%	Upper 95%	Lower 95.0%	Upper 95.0%
38	2,6-dichloropyridine	ClC1=CC=CC(Cl)=N1	Cl		77.2025		-27.9812	-154.48	62.5826	49.8303		0.725743	0.504689	0.526931		80.2443	3.04178	-3.04178												Intercept	76.1343	2.28316	33.3461	1.0667e-44	71.5807	80.6879	71.5807	80.6879
39	2,4-dichloro-pyridine	ClC1=CC(Cl)=CC=N1	Cl		77.3558		-23.1569	-155.542	71.9774	46.5251		0.720847	0.613625	0.518679		76.5634	0.792414	0.792414												X Variable 1	10.9161	2.03179	5.37262	9.6276e-07	6.86377	14.9683	6.86377	14.9683
40	2-chloro-3-(trifluoromethyl)pyridine	ClC1=C(C(F)(F)F)C=CC=N1	Cl		77.6887		-5.01732	-179.848	77.1838	105.185		0.608732	0.673996	0.665142		76.8016	0.88708	0.88708												X Variable 2	-31.5571	1.85071	-17.0513	1.25761e-26	-35.2482	-27.8659	-35.2482	-27.8659
41	2-chloro-6-(trifluoromethyl)pyridine	ClC1=CC=CC(C(F)(F)F)=N1	Cl		78.9094		4.72786	-189.535	77.8247	100.647		0.564047	0.681428	0.65381		75.8188	3.09059	3.09059												X Variable 3	22.9902	2.20446	10.4289	6.77154e-16	18.5935	27.3868	18.5935	27.3868
42	4-chloro-pyridine-2-carboxamide	ClC1=CC=NC(C(N)=O)=C1	Cl		79.7811		-5.69273	-167.507	70.8151	25.1874		0.665658	0.600148	0.465403		75.1614	4.61966	4.61966
43	4-chloro-quinoline	ClC1=CC=NC2=CC=CC=C21	Cl		79.8819		27.3058	-190.327	44.2789	-33.895		0.560397	0.292449	0.317886		80.331	0.449169	-0.449169
44	4-chloro-N-Methylpyridine-2-carboxamide	ClC1=CC=NC(C(NC)=O)=C1	Cl		80.5058		8.10491	-177.841	68.4744	1.88556		0.61799	0.573006	0.407223		74.16	6.34578	6.34578
45	2-chloro-3-bromo-pyridine	ClC1=C(Br)C=CC=N1	Cl		81.0918		-23.1569	-155.223	59.8112	45.9246		0.722316	0.472553	0.51718		80.9968	0.0950147	0.0950147
46	2,3-dichloro-pyridine	ClC1=C(Cl)C=CC=N1	Cl		81.1258		-27.9812	-154.259	60.0677	49.4302		0.726767	0.475527	0.525933		81.1527	0.0269871	-0.0269871
47	2-chloro-5-bromo-pyridine	ClC1=CC=C(Br)C=N1	Cl		82.2146		-17.3677	-162.46	61.375	63.4058		0.688935	0.490686	0.560827		81.0636	1.15095	1.15095
48	4-chloro-6-(pyrrolidin-1-yl)pyrimidine	ClC1=CC(N2CCCC2)=NC=N1	Cl		82.3884		-56.9273	-95.0234	22.6528	-161.213		1	0.0416849	0		85.7349	3.34647	-3.34647
49	4-chloro-7-methoxyquinoline	ClC1=CC=NC2=CC(OC)=CC=C21	Cl		82.6293		13.7976	-171.878	32.9469	-64.5605		0.645496	0.161049	0.241321		83.6463	1.01706	-1.01706
50	2,5-dichloro-pyridine	ClC1=CC=C(Cl)C=N1	Cl		83.0415		-22.192	-161.408	60.398	65.0997		0.693787	0.479357	0.565056		81.5713	1.47016	1.47016
51	2-chloro-5-(1,3-dioxolan-2-yl)pyridine	ClC1=CC=C(C2OCCO2)C=N1	Cl		84.7752		-45.3489	-120.034	29.8655	-32.6442		0.884636	0.125319	0.321009		89.2164	4.44114	-4.44114
52	2-(benzyloxy)-4-chloropyridine	ClC1=CC(OCC2=CC=CC=C2)=NC=C1	Cl		86.2294		-28.22	-122.513	42.617	-47.4188		0.873197	0.273178	0.28412		83.5774	2.65197	2.65197
53	4-chloro-6,7-dimethoxyquinoline	ClC1=CC=NC2=CC(OC)=C(OC)C=C21	Cl		87.58		3.66651	-149.617	21.6297	-97.3361		0.748175	0.0298214	0.159487		87.0269	0.553038	0.553038
54	4-chloro-2-methyl-pyridine	CC1=CC(Cl)=CC=N1	Cl		87.7737		-58.8571	-117.978	39.3211	-45.5314		0.894116	0.234961	0.288833		85.1201	2.65355	2.65355
55	2-chloro-6-methoxypyridine	ClC1=CC=CC(OC)=N1	Cl		88.5591		-73.0418	-112.594	29.0914	-30.5432		0.918951	0.116343	0.326255		89.9948	1.43574	-1.43574
56	2-chloro-pyridine	ClC1=CC=CC=N1	Cl		88.8		-60.7868	-129.248	38.8165	-18.3374		0.842131	0.22911	0.35673		86.2983	2.50171	2.50171
57	2-chloro-6-isopropoxypyridine	ClC1=CC=CC(OC(C)C)=N1	Cl		89.1561		-68.5058	-98.6514	25.2033	-38.7837		0.983265	0.0712589	0.30568		91.6466	2.49048	-2.49048
58	4-(benzyloxy)-2-chloropyridine	ClC1=CC(OCC2=CC=CC=C2)=CC=N1	Cl		90.5979		-40.815	-96.1523	30.2467	-45.7932		0.994793	0.129739	0.288179		89.5246	1.07338	1.07338
59	2-chloro-6-methyl-pyridine	ClC1=CC=CC(C)=N1	Cl		90.608		-62.7165	-118.847	29.5297	-41.1327		0.89011	0.121425	0.299815		88.9117	1.69623	1.69623
60	2-chloro-3-methyl-pyridine	ClC1=C(C)C=CC=N1	Cl		90.828		-68.5058	-113.906	34.386	-28.5343		0.912898	0.177736	0.331271		88.1067	2.72134	2.72134
61	2-chloro-4-methyl-pyridine	ClC1=CC(C)=CC=N1	Cl		91.256		-67.5409	-110.954	28.9759	-42.5973		0.926518	0.115003	0.296159		89.4278	1.82823	1.82823
62	2-chloro-6-(tert-butoxy)-pyridine	ClC1=CC=CC(OC(C)(C)C)=N1	Cl		91.6918		-75.2599	-96.4707	23.2774	-26.1043		0.993324	0.0489268	0.337338		93.1889	1.49717	-1.49717
63	2-chloro-5-methyl-pyridine	ClC1=CC=C(C)C=N1	Cl		94.2552		-63.3572	-119.667	27.5976	-24.9353		0.886327	0.0990213	0.340257		90.5072	3.748	3.748
64	2-chloro-3-methoxypyridine	ClC1=C(OC)C=CC=N1	Cl		94.3527		-71.357	-111.803	25.5504	-28.5542		0.922601	0.0752833	0.331221		91.4445	2.90815	2.90815
65	2-chloro-5-methoxypyridine	ClC1=CC=C(OC)C=N1	Cl		95.6149		-58.2781	-123.97	24.2168	-15.5421		0.866477	0.0598195	0.36371		92.0668	3.5481	3.5481
66	2-chloro-4-fluoropyridine	ClC1=CC(F)=CC=N1	F		72.5954		-56.8762	-131.854	84.4231	44.0827		0.830114	0.757939	0.512581		73.0618	0.466453	-0.466453
67	2-chloro-6-fluoropyridine	ClC1=CC=CC(F)=N1	F		74.9861		-39.7112	-150.071	80.2464	44.1187		0.746083	0.709508	0.512671		73.6749	1.31114	1.31114
68	2-chloro-3-fluoro-5-methyl-pyridine	ClC1=C(F)C=C(C)C=N1	F		79.3836		-38.2417	-142.921	70.4227	142.547		0.779064	0.595598	0.758425		83.2796	3.89598	-3.89598
69	2-chloro-3-fluoropyridine	ClC1=C(F)C=CC=N1	F		79.3991		-40.2428	-149.81	79.8346	166.128		0.747285	0.704733	0.817304		80.8423	1.44327	-1.44327
70	1-bromo-3,5-difluorobenzene	BrC1=CC(F)=CC(F)=C1	F		80.8536		-60.9624	-115.354	63.9978	119.662		0.906222	0.521098	0.701286		85.705	4.85139	-4.85139
71	2-bromo-5-fluoropyridine	BrC1=CC=C(F)C=N1	F		81.2061		-25.5739	-162.258	81.2011	177.914		0.68987	0.720579	0.84673		80.3921	0.814009	0.814009
72	2-chloro-5-fluoropyridine	ClC1=CC=C(F)C=N2	F		82.1608		-32.0096	-159.942	78.9946	175.284		0.700552	0.694993	0.840163		81.1651	0.995711	0.995711
73	1-bromo-4-fluorobenzene	BrC1=CC=C(F)C=C1	F		90.3579		-64.1899	-105.01	43.9798	70.0038		0.953934	0.288981	0.5773		90.7003	0.342415	-0.342415
74	1-chloro-4-fluorobenzene	ClC1=CC=C(F)C=C1	F		91.2312		-82.8978	-103.157	42.1158	68.8623		0.96248	0.267366	0.57445		91.4102	0.17897	-0.17897
						Max	127.819	-95.0234	105.299	239.3						All data fit
						Min	-82.8978	-311.817	19.0579	-161.213						MAE All	1.91056
																MAE Br	1.58159
																MAE Cl	2.05764
							EA vs. LUMO									MAE F	1.58882
							R2 All	0.94049								R2 All	0.917043
							R2 Br	0.936207								R2 Br	0.953856
							R2 Cl	0.94199								R2 Cl	0.912659
							R2 F	0.913575								R2 F	0.888074

## Sheet: SNAr All_LUMO by Entos
Entry	Name	SMILES	Halide		Measured ΔG‡SNAr (kJ/mol)		Electron affinity (EA) (kJ/mol)	LUMO by Entos (kJ/mol)	ESP1 (kJ/mol)	ESP2 (kJ/mol)		Norm. LUMO	Norm. ESP1	Norm. ESP2		Predicted ΔG‡SNAr (kJ/mol)	Absolute Error (all data)	Residuals (all data)		MLR Coefficients
1	2-bromo-5-nitropyridine	BrC1=CC=C([N+]([O-])=O)C=N1	Br		64.3555		127.819	-939.965	98.6601	200.298		0	0.923024	0.90262		67.9122	3.55671	-3.55671		LUMO	ESP1	ESP2	Intercept				SUMMARY OUTPUT - NATIVE DESCRIPTORS
2	4-bromo-2-cyanopyridine	BrC1=CC=NC(C#N)=C1	Br		70.8426		54.4187	-836.975	98.1366	141.966		0.453168	0.916953	0.756976		69.5273	1.31535	1.31535		0.0472501	-0.379092	0.0591393	137.881	all data
3	2-bromo-5-cyanopyridine	BrC1=CC=C(C#N)C=N1	Br		72.2835		52.7813	-833.522	90.676	166.995		0.468358	0.830445	0.819468		73.9988	1.71535	-1.71535		10.6003	-33.0543	24.1063	76.8129	all data (norm.)			Regression Statistics
4	2-bromo-3-cyanopyridine	BrC1=C(C#N)C=CC=N1	Br		73.0073		52.4889	-833.864	88.8284	150.752		0.466855	0.80902	0.778913		73.7225	0.71521	-0.71521		0.156437	0.487808	0.355755		% contribution			Multiple R	0.952342
5	2-bromo-3-(trifluoromethyl)pyridine	BrC1=C(C(F)(F)F)C=CC=N1	Br		76.9183		6.48393	-826.866	74.4146	110.57		0.497648	0.641886	0.678585		77.141	0.222712	-0.222712									R Square	0.906955
6	2-bromo-5-(trifluoromethyl)pyridine	BrC1=CC=C(C(F)(F)F)C=N1	Br		76.9722		55.1137	-823.475	74.3893	123.515		0.512567	0.641593	0.710907		78.0763	1.10408	-1.10408		67.7609							Adjusted R Square	0.902967
7	4-bromo-2-chloro-pyridine	ClC1=CC(Br)=CC=N1	Br		76.9948		-16.4028	-778.987	68.4263	48.2352		0.70832	0.572449	0.522949		77.9869	0.992112	-0.992112									Standard Error	2.6062
8	1-bromo-4-nitrobenzene	BrC1=CC=C([N+]([O-])=O)C=C1	Br		78.6143		101.577	-918.617	72.6719	212.671		0.0939323	0.621679	0.933511		79.5045	0.890191	-0.890191									Observations	74
9	2,5-dibromo-pyridine	BrC1=CC=C(Br)C=N1	Br		81.9831		-11.3565	-770.697	57.0993	68.6556		0.744797	0.441108	0.573934		83.8803	1.89711	-1.89711
10	1-bromo-3,5-bis(trifluoromethyl)benzene	BrC1=CC(C(F)(F)F)=CC(C(F)(F)F)=C1	Br		85.9779		17.1592	-853.523	81.7621	239.3		0.380353	0.727084	1		80.7091	5.26879	5.26879									ANOVA
11	2-bromopyridine	BrC1=CC=CC=N1	Br		86.2187		-54.0327	-752.24	35.5302	-11.3949		0.82601	0.191004	0.374064		88.1949	1.97621	-1.97621										df	SS	MS	F	Significance F
12	2-bromo-5-methypyridine	BrC1=CC=C(C)C=N1	Br		90.222		-56.9273	-743.203	24.3671	-17.1958		0.865773	0.0615626	0.359581		92.5107	2.28868	-2.28868									Regression	3	4634.52	1544.84	227.44	5.16221e-36
13	2-bromo-3-methoxypyridine	BrC1=C(OC)C=CC=N1	Br		92.4118		-50.0748	-737.745	34.3974	-2.05861		0.889786	0.177869	0.397375		89.8613	2.55049	2.55049									Residual	70	475.46	6.79229
14	2-bromo-5-methoxypyridine	BrC1=CC=C(OC)C=N1	Br		94.913		-53.8996	-742.631	19.0579	-8.78962		0.868291	0	0.380569		95.0475	0.134534	-0.134534									Total	73	5109.98
15	2,4-dichloropyrimidine	ClC1=NC(Cl)=CC=N1	Cl		61.3806		12.6301	-807.709	101.171	17.2963		0.581939	0.952138	0.445701		62.3869	1.00629	-1.00629
16	4,6-dichloropyrimidine	ClC1=CC(Cl)=NC=N1	Cl		62.034		4.61787	-801.59	99.1485	24.3398		0.608864	0.928687	0.463287		63.8593	1.82525	-1.82525										Coefficients	Standard Error	t Stat	P-value	Lower 95%	Upper 95%	Lower 95.0%	Upper 95.0%
17	2-chloro-5-nitropyridine	ClC1=CC=C([N+]([O-])=O)C=N1	Cl		64.0292		123.214	-936.973	105.299	196.458		0.0131654	1	0.89303		65.3099	1.28066	-1.28066									Intercept	137.881	7.24084	19.0422	2.13912e-29	123.44	152.323	123.44	152.323
18	2-chloro-3-nitropyridine	ClC1=C([N+]([O-])=O)C=CC=N1	Cl		67.7304		113.855	-928.221	101.824	176.895		0.0516723	0.959711	0.844185		65.8836	1.84676	1.84676									X Variable 1	0.0472501	0.00989367	4.77579	9.51909e-06	0.0275178	0.0669824	0.0275178	0.0669824
19	4,6-dichloro-2-methylpyrimidine	ClC1=NC(C)=NC(Cl)=C1	Cl		67.8169		-2.25973	-788.124	86.0815	-0.8368		0.668114	0.777169	0.400426		67.9602	0.14324	-0.14324									X Variable 2	-0.379092	0.0212955	-17.8015	1.07804e-27	-0.421564	-0.336619	-0.421564	-0.336619
20	4-chloro-2-(trifluoromethyl)quinoline	ClC1=CC(C(F)(F)F)=NC2=CC=CC=C21	Cl		69.2354		69.4706	-874.986	75.2683	69.5043		0.285915	0.651785	0.576053		72.1151	2.87968	-2.87968									X Variable 3	0.0591393	0.0059919	9.86987	6.86879e-15	0.0471888	0.0710897	0.0471888	0.0710897
21	4-chloro-6-(trifluoromethyl)quinoline	ClC1=CC=NC2=CC=C(C(F)(F)F)C=C21	Cl		69.9828		74.295	-871.787	74.1677	59.3797		0.299989	0.639023	0.550774		72.0847	2.10188	-2.10188
22	2-chloro-5-cyano-pyridine	ClC1=CC=C(C#N)C=N1	Cl		70.6115		46.3138	-832.264	96.677	163.098		0.473894	0.900028	0.809738		71.5529	0.941358	-0.941358										SUMMARY OUTPUT - NORMALIZED DESCRIPTORS
23	2-chloro-4,6-dimethyl-3-cyano-pyridine	ClC1=C(C#N)C(C)=CC(C)=N1	Cl		71.4942		24.6042	-808.483	74.3952	96.1142		0.578534	0.641661	0.642493		77.162	5.66778	-5.66778
24	4-chloro-2-(methylthio)pyrimidine	CSC1=NC=CC(Cl)=N1	Cl		71.6882		-16.7801	-772.183	67.6649	-38.0744		0.738259	0.56362	0.307451		73.4928	1.8046	-1.8046										Regression Statistics
25	3,4,5-trichloro-pyridine	ClC1=CN=CC(Cl)=C1Cl	Cl		72.1837		-2.89461	-793.816	90.1805	108.8		0.64307	0.824699	0.674167		72.6212	0.437488	-0.437488										Multiple R	0.955284
26	2-chloro-3-cyano-pyridine	ClC1=C(C#N)C=CC=N1	Cl		72.4308		49.0154	-836.558	95.859	150.244		0.455002	0.890543	0.777643		70.8999	1.53087	1.53087										R Square	0.912568
27	2-chloro-4-cyano-pyridine	ClC1=CC(C#N)=CC=N1	Cl		73.1654		69.8566	-855.506	91.9308	149.603		0.371628	0.844994	0.776044		71.4559	1.70946	1.70946										Adjusted R Square	0.908821
28	4-chloro-2-methylpyrimidine	ClC1=CC=NC(C)=N1	Cl		73.2717		-31.8407	-774.781	68.0204	-60.3884		0.726826	0.567742	0.251738		71.9156	1.3561	1.3561										Standard Error	2.52636
29	2-chloro-6-cyano-pyridine	ClC1=CC=CC(C#N)=N1	Cl		73.9494		54.5152	-842.949	91.9131	147.579		0.426879	0.844789	0.77099		71.9362	2.01318	2.01318										Observations	74
30	4-chloro-2-(trifluoromethyl)pyridine	ClC1=CC=NC(C(F)(F)F)=C1	Cl		74.37		3.08758	-827.502	88.136	96.1254		0.494846	0.800991	0.642521		71.055	3.31504	3.31504
31	2-chloro-5-(trifluoromethyl)pyridine	ClC1=CC=C(C(F)(F)F)C=N1	Cl		74.6968		0.578922	-826.878	80.5433	117.45		0.497593	0.712951	0.695764		75.2239	0.527156	-0.527156										ANOVA
32	2-chloro-4-(trifluoromethyl)pyridine	ClC1=CC(C(F)(F)F)=CC=N1	Cl		75.7475		14.9555	-839.64	76.3185	102.229		0.441441	0.663963	0.65776		75.3224	0.425101	0.425101											df	SS	MS	F	Significance F
33	2-chloro-6-bromo-pyridine	BrC1=CC=CC(Cl)=N1	Cl		76.6031		-21.2271	-774.282	64.0013	54.8608		0.729021	0.521139	0.539491		80.2786	3.67543	-3.67543										Regression	3	4663.2	1554.4	243.541	5.86507e-37
34	4-chloro-3-bromo-pyridine	BrC1=CN=CC=C1Cl	Cl		76.6235		-25.0866	-770.889	70.9904	42.0862		0.743952	0.602181	0.507596		77.0339	0.410395	-0.410395										Residual	70	446.775	6.38251
35	3,4-dichloro-pyridine	ClC1=CN=CC=C1Cl	Cl		76.7622		-28.9461	-776.349	71.4814	46.3825		0.719927	0.607874	0.518323		76.8439	0.0816868	-0.0816868										Total	73	5109.98
36	4-(6-chloropyrimidin-4-yl)morpholine	ClC1=NC=NC(N2CCOCC2)=C1	Cl		76.897		-46.3138	-738.079	39.2217	-98.4452		0.888317	0.233808	0.156718		82.3165	5.4195	-5.4195
37	2-chloro-6-methyl-4 (trifluoromethyl)pyridine	ClC1=CC(C(F)(F)F)=CC(C)=N1	Cl		77.1792		-4.72786	-823.67	66.4097	76.6996		0.511709	0.549066	0.594019		78.3235	1.14424	-1.14424											Coefficients	Standard Error	t Stat	P-value	Lower 95%	Upper 95%	Lower 95.0%	Upper 95.0%
38	2,6-dichloropyridine	ClC1=CC=CC(Cl)=N1	Cl		77.2025		-27.9812	-777.974	62.5826	49.8303		0.712777	0.504689	0.526931		80.3444	3.14194	-3.14194										Intercept	76.8129	2.36363	32.4979	5.81401e-44	72.0988	81.527	72.0988	81.527
39	2,4-dichloro-pyridine	ClC1=CC(Cl)=CC=N1	Cl		77.3558		-23.1569	-776.699	71.9774	46.5251		0.718386	0.613625	0.518679		76.6477	0.708087	0.708087										X Variable 1	10.6003	2.17261	4.87906	6.45438e-06	6.26715	14.9334	6.26715	14.9334
40	2-chloro-3-(trifluoromethyl)pyridine	ClC1=C(C(F)(F)F)C=CC=N1	Cl		77.6887		-5.01732	-825.599	77.1838	105.185		0.503222	0.673996	0.665142		75.8326	1.85608	1.85608										X Variable 2	-33.0543	1.78737	-18.4933	1.18586e-28	-36.6191	-29.4895	-36.6191	-29.4895
41	2-chloro-6-(trifluoromethyl)pyridine	ClC1=CC=CC(C(F)(F)F)=N1	Cl		78.9094		4.72786	-831.762	77.8247	100.647		0.476102	0.681428	0.65381		75.03	3.87936	3.87936										X Variable 3	24.1063	2.34407	10.2839	1.23175e-15	19.4312	28.7814	19.4312	28.7814
42	4-chloro-pyridine-2-carboxamide	ClC1=CC=NC(C(N)=O)=C1	Cl		79.7811		-5.69273	-819.289	70.8151	25.1874		0.530984	0.600148	0.465403		73.814	5.96704	5.96704
43	4-chloro-quinoline	ClC1=CC=NC2=CC=CC=C21	Cl		79.8819		27.3058	-819.386	44.2789	-33.895		0.530559	0.292449	0.317886		80.375	0.493181	-0.493181
44	4-chloro-N-Methylpyridine-2-carboxamide	ClC1=CC=NC(C(NC)=O)=C1	Cl		80.5058		8.10491	-810.876	68.4744	1.88556		0.568005	0.573006	0.407223		73.7209	6.78492	6.78492
45	2-chloro-3-bromo-pyridine	ClC1=C(Br)C=CC=N1	Cl		81.0918		-23.1569	-777.807	59.8112	45.9246		0.713512	0.472553	0.51718		81.1719	0.0801669	-0.0801669
46	2,3-dichloro-pyridine	ClC1=C(Cl)C=CC=N1	Cl		81.1258		-27.9812	-772.89	60.0677	49.4302		0.735147	0.475527	0.525933		81.5144	0.388624	-0.388624
47	2-chloro-5-bromo-pyridine	ClC1=CC=C(Br)C=N1	Cl		82.2146		-17.3677	-776.222	61.375	63.4058		0.720487	0.490686	0.560827		81.6879	0.526701	0.526701
48	4-chloro-6-(pyrrolidin-1-yl)pyrimidine	ClC1=CC(N2CCCC2)=NC=N1	Cl		82.3884		-56.9273	-712.697	22.6528	-161.213		1	0.0416849	0		86.0849	3.69648	-3.69648
49	4-chloro-7-methoxyquinoline	ClC1=CC=NC2=CC(OC)=CC=C21	Cl		82.6293		13.7976	-804.934	32.9469	-64.5605		0.594149	0.161049	0.241321		83.5402	0.910978	-0.910978
50	2,5-dichloro-pyridine	ClC1=CC=C(Cl)C=N1	Cl		83.0415		-22.192	-783.571	60.398	65.0997		0.688149	0.479357	0.565056		81.8112	1.23032	1.23032
51	2-chloro-5-(1,3-dioxolan-2-yl)pyridine	ClC1=CC=C(C2OCCO2)C=N1	Cl		84.7752		-45.3489	-756.963	29.8655	-32.6442		0.805228	0.125319	0.321009		88.8625	4.0873	-4.0873
52	2-(benzyloxy)-4-chloropyridine	ClC1=CC(OCC2=CC=CC=C2)=NC=C1	Cl		86.2294		-28.22	-742.839	42.617	-47.4188		0.867374	0.273178	0.28412		83.8221	2.40725	2.40725
53	4-chloro-6,7-dimethoxyquinoline	ClC1=CC=NC2=CC(OC)=C(OC)C=C21	Cl		87.58		3.66651	-788.102	21.6297	-97.3361		0.668212	0.0298214	0.159487		86.6875	0.89251	0.89251
54	4-chloro-2-methyl-pyridine	CC1=CC(Cl)=CC=N1	Cl		87.7737		-58.8571	-743.411	39.3211	-45.5314		0.864856	0.234961	0.288833		85.1561	2.61752	2.61752
55	2-chloro-6-methoxypyridine	ClC1=CC=CC(OC)=N1	Cl		88.5591		-73.0418	-742.741	29.0914	-30.5432		0.867807	0.116343	0.326255		89.9522	1.39316	-1.39316
56	2-chloro-pyridine	ClC1=CC=CC=N1	Cl		88.8		-60.7868	-759.151	38.8165	-18.3374		0.795599	0.22911	0.35673		86.212	2.58803	2.58803
57	2-chloro-6-isopropoxypyridine	ClC1=CC=CC(OC(C)C)=N1	Cl		89.1561		-68.5058	-739.963	25.2033	-38.7837		0.88003	0.0712589	0.30568		91.0701	1.914	-1.914
58	4-(benzyloxy)-2-chloropyridine	ClC1=CC(OCC2=CC=CC=C2)=CC=N1	Cl		90.5979		-40.815	-717.718	30.2467	-45.7932		0.977911	0.129739	0.288179		89.7947	0.80323	0.80323
59	2-chloro-6-methyl-pyridine	ClC1=CC=CC(C)=N1	Cl		90.608		-62.7165	-745.388	29.5297	-41.1327		0.856157	0.121425	0.299815		89.0347	1.57326	1.57326
60	2-chloro-3-methyl-pyridine	ClC1=C(C)C=CC=N1	Cl		90.828		-68.5058	-747.22	34.386	-28.5343		0.848095	0.177736	0.331271		87.8522	2.97578	2.97578
61	2-chloro-4-methyl-pyridine	ClC1=CC(C)=CC=N1	Cl		91.256		-67.5409	-744.252	28.9759	-42.5973		0.861154	0.115003	0.296159		89.2117	2.04427	2.04427
62	2-chloro-6-(tert-butoxy)-pyridine	ClC1=CC=CC(OC(C)(C)C)=N1	Cl		91.6918		-75.2599	-740.072	23.2774	-26.1043		0.87955	0.0489268	0.337338		92.5449	0.853131	-0.853131
63	2-chloro-5-methyl-pyridine	ClC1=CC=C(C)C=N1	Cl		94.2552		-63.3572	-750.806	27.5976	-24.9353		0.832319	0.0990213	0.340257		90.4691	3.78612	3.78612
64	2-chloro-3-methoxypyridine	ClC1=C(OC)C=CC=N1	Cl		94.3527		-71.357	-740.863	25.5504	-28.5542		0.876069	0.0752833	0.331221		91.5009	2.85176	2.85176
65	2-chloro-5-methoxypyridine	ClC1=CC=C(OC)C=N1	Cl		95.6149		-58.2781	-752.026	24.2168	-15.5421		0.826948	0.0598195	0.36371		92.2485	3.36636	3.36636
66	2-chloro-4-fluoropyridine	ClC1=CC(F)=CC=N1	F		72.5954		-56.8762	-771.975	84.4231	44.0827		0.739172	0.757939	0.512581		72.0084	0.586966	0.586966
67	2-chloro-6-fluoropyridine	ClC1=CC=CC(F)=N1	F		74.9861		-39.7112	-789.728	80.2464	44.1187		0.661058	0.709508	0.512671		72.7551	2.23101	2.23101
68	2-chloro-3-fluoro-5-methyl-pyridine	ClC1=C(F)C=C(C)C=N1	F		79.3836		-38.2417	-776.54	70.4227	142.547		0.719086	0.595598	0.758425		82.9232	3.53965	-3.53965
69	2-chloro-3-fluoropyridine	ClC1=C(F)C=CC=N1	F		79.3991		-40.2428	-786.959	79.8346	166.128		0.673243	0.704733	0.817304		80.2576	0.858538	-0.858538
70	1-bromo-3,5-difluorobenzene	BrC1=CC(F)=CC(F)=C1	F		80.8536		-60.9624	-770.915	63.9978	119.662		0.743838	0.521098	0.701286		84.2713	3.41766	-3.41766
71	2-bromo-5-fluoropyridine	BrC1=CC=C(F)C=N1	F		81.2061		-25.5739	-789.553	81.2011	177.914		0.661827	0.720579	0.84673		80.314	0.892113	0.892113
72	2-chloro-5-fluoropyridine	ClC1=CC=C(F)C=N2	F		82.1608		-32.0096	-796.089	78.9946	175.284		0.633068	0.694993	0.840163		80.6861	1.47475	1.47475
73	1-bromo-4-fluorobenzene	BrC1=CC=C(F)C=C1	F		90.3579		-64.1899	-737.271	43.9798	70.0038		0.891875	0.288981	0.5773		90.5129	0.154965	-0.154965
74	1-chloro-4-fluorobenzene	ClC1=CC=C(F)C=C1	F		91.2312		-82.8978	-747.028	42.1158	68.8623		0.84894	0.267366	0.57445		90.691	0.540243	0.540243
						Max		-712.697	105.299	239.3						All data fit
						Min		-939.965	19.0579	-161.213						MAE All	1.94168
																MAE Br	1.75911
																MAE Cl	2.0659
																MAE F	1.52177
							R2 All	0.884541								R2 All	0.912515
							R2 Br	0.911749								R2 Br	0.93743
							R2 Cl	0.895264								R2 Cl	0.908665
							R2 F	0.743556								R2 F	0.904651

## Sheet: Fig.5_Site selectivity
	Substrate	SMILES	Prediction	C–X position	Halogen	Observed ΔG‡SNAr (kJ/mol)	Observed ΔΔG‡ (kJ/mol)	Electron affinity (EA) (kJ/mol)	ESP1 (kJ/mol)	ESP2 (kJ/mol)		Predicted ΔG‡SNAr (kJ/mol)	Predicted ΔΔG‡SNAr (kJ/mol)		MLR Coefficients
	*2,4-dichloropyridine	ClC1=CC(Cl)=CC=N1	1st site correct 2nd site correct	C4	Cl	77.7	0	-23.1569	71.9774	46.4424		76.5722	0		EA	ESP1	ESP2	Intercept
				C2	Cl	83.9	6.2	-51.032	60.206	46.4424		82.2632	5.69097		-0.0465164	-0.373305	0.0551648	99.8026
	*4-bromo-2-chloropyridine	ClC1=CC(Br)=CC=N1	1st site correct 2nd site correct	C4	Br	77.7	0	-16.4028	68.4082	48.116		77.6827	0
				C2	Cl	83.4	5.7	-45.3778	60.7451	48.116		81.8912	4.20852
	*2,4-dichloropyrimidine	ClC1=NC(Cl)=CC=N1	1st site correct 2nd site correct	C4	Cl	61.3806	0	12.6301	101.171	17.5728		62.4168	0
				C2	Cl	66.2806	4.9	-14.1932	92.3132	17.5728		66.9712	4.55437
	2-chloro-5-fluoropyridine	ClC1=CC=C(F)C=N2	1st site correct 2nd site correct	C5	F	81.1	0	-32.0096	78.9946	178.657		81.658	0
				C2	Cl	88.8	7.7		56.1613	74.8936		84.4577	2.7997
	2-chloro-3-fluoropyridine	ClC1=C(F)C=CC=N1	1st site correct 2nd site correct	C3	F	79.64	0	-40.2428	79.8346	166.105		81.035	0
				C2	Cl	85.34	5.7		61.0166	64.4336		82.4512	1.41619
	2-chloro-3-fluoro-5-methyl-pyridine	ClC1=C(F)C=C(C)C=N1	1st site correct 2nd site correct	C3	F	78.32	0	-38.2417	70.4227	142.674		83.1629	0
				C2	Cl	86.02	7.7		49.9166	54.8104		85.9709	2.80803
	2-chloro-4-fluoropyridine	ClC1=CC(F)=CC=N1	correct	C4	F	72.72	0	-56.8762	84.4231	43.932		73.3561	0
				C2	Cl	NA	>10		58.9825	43.932		82.8533	9.49712
	2-chloro-6-fluoropyridine	ClC1=CC=CC(F)=N1	correct	C6	F	73.91	0	-39.7112	80.2464	44.1187		74.1272	0
				C2	Cl	NA	>10		61.3658	44.1187		81.1754	7.04824
	3,4,5-trichloropyridine	ClC1=CN=CC(Cl)=C1Cl	correct	C4	Cl	72.4	0	-2.89461	90.1805	108.8		72.2743	0
				C3	Cl	NA	>10		80.8856	223.426		82.0674	9.79312
	2-chloro-5-bromopyridine	ClC1=CC=C(Br)C=N1	correct	C2	Cl	82.78	0	-17.3677	61.375	63.4058		81.1966	0
				C5	Br	NA	>10		62.51	184.096		87.4307	6.23412
	2-chloro-3-bromopyridine	ClC1=C(Br)C=CC=N1	correct	C2	Cl	81.97	0	-23.1569	59.8112	45.9246		81.0853	0
				C3	Br	NA	>10		59.451	167.36		87.9187	6.83344
	3,4-dichloropyridine	ClC1=CN=CC=C1Cl	correct	C4	Cl	78.16	0	-28.9461	71.4814	46.3825		77.0233	0
				C3	Cl	NA	>10		65.022	170.707		86.293	9.26968
	2-bromo-5-fluoropyridine	BrC1=CC=C(F)C=N1	correct	C5	F	80	0	-25.5739	81.2011	177.82		80.4887	0
				C2	Br	NA	>10		52.3642	80.7512		85.8989	5.41019
	* LUMO energy is used for the major site and LUMO+1 energy is used for the minor site to make prediction
	C4	Observed major site
	C2	Observed minor site
	C6	No reacitivity observed

[truncated: 6 more sheets: Fig.7_Reactivity ranking, Fig.8 prediction, Fig.9 prediction, Fig.10 prediction, Fig.11 prediction, Fig.12 prediction]
